**Title:** Assessing the role of long-noncoding RNA in nucleus accumbens in subjects with alcohol dependence

**Running Title:** Integrative analysis of long noncoding RNA in Nucleus Accumbens

Gowon O. McMichael<sup>1\*</sup>, John Drake<sup>2\*</sup>, Eric Sean Vornholt<sup>1</sup>, Kellen Cresswell<sup>2</sup>, Vernell Williamson<sup>4</sup>, Chris Chatzinakos<sup>1</sup>, Mohammed Mamdani<sup>1</sup>, Siddharth Hariharan<sup>3</sup>, Kenneth S. Kendler<sup>1,7,8</sup>, Michael F. Miles<sup>1,9</sup>, Gursharan Kalsi<sup>6</sup>, Brien P. Riley<sup>1,7,8</sup>, Mikhail Dozmorov<sup>2</sup>, Silviu-Alin Bacanu<sup>1,7</sup>, Vladimir I. Vladimirov<sup>1,7,10,11\*</sup>

<sup>1</sup>Virginia Institute for Psychiatric and Behavioral Genetics, Virginia Commonwealth University, Richmond, VA, USA

<sup>2</sup>Department of Biostatistics, Virginia Commonwealth University, Richmond, VA, USA

<sup>3</sup>Summer Research Fellowship, School of Medicine, Virginia Commonwealth University, Richmond, VA, USA

<sup>4</sup>Department of Pathology, Virginia Commonwealth University, Richmond, VA, USA

<sup>5</sup>Department of Psychology, Virginia Commonwealth University, Richmond, VA, USA

<sup>6</sup>Department of Social, Genetic and Developmental Psychiatry, Institute of Psychiatry, London SE5 8AF, UK

<sup>7</sup>Department Psychiatry, Virginia Commonwealth University, Richmond, VA, US

<sup>8</sup>Department of Human & Molecular Genetics, Virginia Commonwealth University, Richmond, VA, US

<sup>9</sup>Department of Pharmacology & Toxicology, Virginia Commonwealth University, Richmond, VA, US

<sup>10</sup>Center for Biomarker Research and Personalized Medicine, Virginia Commonwealth University, Richmond, VA, USA

<sup>11</sup>Lieber Institute for Brain Development, Johns Hopkins University, Baltimore, MD, USA.

Corresponding Author: Vladimir Vladimirov, MD, PhD

E-mail: [vladimir.vladimirov@vcuhealth.org](mailto:vladimir.vladimirov@vcuhealth.org)

**Key Words:** long noncoding RNA, gene expression, eQTLs, postmortem brain, Nucleus Accumbens, Alcohol Dependence

## Abstract

Recently, long noncoding RNA (lncRNA) were implicated in the etiology of alcohol dependence (AD). As lncRNA provide another layer of complexity to the transcriptome, assessing their expression in the brain is the first critical step towards understanding lncRNA functions in AD. To that end, we profiled the expression of lncRNA and protein coding genes (PCG) in nucleus accumbens (NAc) from 41 subjects with AD and 41 controls. At false discovery rate (FDR) of 5%, we identified 69 and 309 differentially expressed lncRNA and PCG genes, respectively. Using co-expression network analyses, we identified three lncRNA and five PCG modules significantly correlated with AD at Bonferroni adj.  $p \leq 0.05$ . To better understand lncRNA functions, we integrated the lncRNA and PCG hubs from the significant AD modules; at FDR of 5%, we identified 3 151 positive and 2 255 negative correlations supporting the functional role of lncRNA in the development of AD. Gene enrichment analysis revealed that PCG significantly correlated with lncRNA are, among others, enriched for neuronal and immune related processes. To highlight the mechanisms, by which genetic variants contribute to AD, we integrated lncRNA and PCG hubs with genome-wide SNP data. At  $FDR \leq 0.3$ , we identified 276 expression quantitative trait loci (eQTL), affecting the expression of 20 and 256 lncRNA and PCG hubs, respectively. Our study is the first to profile lncRNA expression in nucleus accumbens in a large postmortem alcohol brain sample and our results may provide novel insights into the regulation of the brain transcriptome across disease.

## Introduction

Alcohol Use Disorder (AUD) is a chronic and debilitating disease with an estimated heritability around 50%(1). Previous postmortem brain expression studies have shown that chronic alcohol consumption leads to broad transcriptional changes in different brain regions(2;3). Gene expression studies in prefrontal cortex (PFC), have identified genes encoding to GABA<sub>A</sub> receptor subunits or related to mitochondrial function(4;5) as well as in functions related to myelination, cell cycling, oxidative stress, and transcription(2;6-11). Expression studies in nucleus accumbens (NAc) and ventral tegmental area (VTA), have also revealed gene expression changes related to cell architecture, signaling, vesicle formation and synaptic transmission(7). These findings suggest that there are region-specific susceptibilities and adaptations to chronic alcohol consumption in the brain that are likely to have a distinct effect on the behavioral phenotypes comprising AUD(12).

Evaluation of the regulatory mechanisms underlying genetic differentiation is necessary to better understand the neurobiology of alcohol addiction(13). The recent emergence of long noncoding RNA (lncRNA) has provided an additional layer of transcriptional and translational control that could highlight important neurobiological mechanisms underlying AUD that could be missed if only the protein coding genome was studied. LncRNA are longer than 200 base pairs (bp) with limited or no protein coding potential(14) and while they have not been functionally fully characterized yet, they were shown to participate in chromatin remodeling(15), transcriptional and post-transcriptional regulation(16), and in sequestering miRNA(17;18). LncRNA have also been implicated in the plasticity of neuronal circuitry(19) and in neurodegenerative and neuropsychiatric disorders including substance abuse and alcohol dependence(20;21); the potential role of lncRNA in the etiology of AUD was also further supported by several recent alcohol-related genome-wide association scans (GWAS)(22;23). Due to the complex nature of lncRNA functions, the relationship between lncRNA and alcohol consumption has been understudied; while miRNA roles in the control of gene expression and functions in the brains of subjects with AUD have been reported(2;24-27), to our knowledge the interactions between lncRNA and protein coding genes (PCG) are still largely undescribed.

Gene expression alone cannot explain the complex etiology of AUD and assessing lncRNA

and PCG expression in the context of available genetic data is necessary to discern the genetic basis of AUD susceptibility. This approach models associations between genetic variants and gene expression as quantitative traits, i.e. expression quantitative trait loci (eQTL)(28-30). EQTLs can help discover unknown AUD risk loci or offer specific, testable, hypotheses for the genetic impact of polymorphisms associated with AUD(31-33). Linkage disequilibrium (LD) of eQTLs with genetic variants implicated in AUD can further establish a biological mechanism for disease-associated variants with no apparent functions; there is empirical evidence suggesting that eQTLs are over-represented among GWAS signals(34;35).

We hypothesize that lncRNA are involved in the neuropathology of AUD and that, on a molecular level, this involvement is manifested by differential patterns of expression between cases with alcohol dependence (AD) and controls. To better understand the lncRNA disease functions in subjects with AD we further performed a weighted gene co-expression network analysis (WGCNA) that led to identification of lncRNA and PCG modules significantly correlated with AD. Key genes from these lncRNA and PCG modules (i.e., 'hubs') were then correlated with each other to identify a set of interacting lncRNA and PCG modules. Since lncRNA are not yet annotated, we used system approaches to assign biological functions for the PCG hubs interacting with the lncRNA hubs. By integrating our genome-wide SNP and expression data, we also identified expression quantitative trait loci (eQTL) affecting the expression of lncRNA and PCG in NAc. In this study, our overall goal is to profile lncRNA and PCG expressions in NAc and test whether these are under the control of specific genetic elements. To the best of our knowledge this is the only study to comprehensively assess the lncRNA expression between subjects with AD and controls in postmortem AD case and control brain tissues.

## **Methods and Materials**

### **Postmortem tissue**

Brain tissue from 41 cases with AD and 41 controls was received from the Australian Brain Donor Program, New South Wales Tissue Resource Centre, which is supported by The University of Sydney, National Health and Medical Research Council of Australia, Schizophrenia Research Institute, National Institute of Alcohol Abuse and Alcoholism, and the New South Wales Department of Health (<http://sydney.edu.au/medicine/pathology/trc/>). (Suppl. Methods; Suppl. Table 1).

### **RNA isolation and sample selection**

Total RNA was isolated from 50mg of frozen tissue from NAc using the mirVana-PARIS kit (Thermo Fisher, Carlsbad, CA), following manufacturer's protocols. RNA concentration was measured using the Quant-iT Broad Range RNA Assay kit (Life Technologies), and the RNA Integrity Number (RIN) was measured on the Agilent 2100 Bioanalyzer (Agilent Technologies, Inc., Santa Clara, CA).

### **Expression arrays and data normalization**

The RNA samples were assayed using the Arraystar Human lncRNA Array v3.0 (Rockville, MD, USA) that is designed to profile both lncRNA and PCG. The expression values were calculated and normalized using the 75<sup>th</sup> percentile value for each microarray in the Agilent Feature Extraction text file, followed by Log<sub>2</sub> transformation and batch effect removal in the Partek® Genomics Suite® (PGS) software, v6.6 (St. Louis, MO, USA). Probes with expression values outside the detectable 'spike-in' range in more than 50% of the sample, or if they were flagged as "*glsWellAboveBG=0*" and "*glsPosAndSignif=0*" in more than 75% of the arrays were excluded from the downstream analyses. Upon removal of low expressed probes, the final number of probes that were used in the subsequent analyses was 19,458. The efficiency of batch effect removal and overall array quality were assessed using principal components analysis (PCA) on the expression values in which each array is plotted along the first three principle components (PCs) to identify potential outliers. Of the 82 samples, 9 samples were excluded due to low RINs (i.e. RINs $\leq$ 4), leaving 73 samples for the microarray run. Of

the 73 samples run on the array, 8 samples (5 cases and 3 controls) did not load on two of the first three PCs and were removed from the subsequent analysis, leaving a final sample size of N=65.

## **Statistical Analyses**

### **Gene Expression Analysis**

The univariate gene expression analyses were performed in the Number Cruncher Statistical Software (NCSS) v11, using a robust multiple regression model(2). Prior to the main analyses, technical (e.g. RIN, PMI, RI) and biological (e.g. smoking, medication, age) confounds and the first 5 principle components (PCs) were used as covariates in the regression analysis. Microarray reliability was validated by assessing the expression of 5 genes at the Arraystar facilities using quantitative PCR (qPCR). The assessed genes showed very high correlation between the two platforms (Suppl. Methods and Suppl. Fig. 1).

### **Weighted Gene Co-expression Network Analysis (WGCNA)**

Gene co-expression networks were constructed separately for the lncRNA and PCG using the WGCNA v1.36 package in R environment (v3.5.2). While, WGCNA allows for the inclusion of additional variables, it does not correct for their effects, therefore the gene networks were built using the residuals from the regression model. WGCNA relies on pair-wise Pearson correlations to generate a signed similarity matrix, selecting for positive correlations only. The signed similarity matrix of the lncRNA and PCG expression data was raised to the lowest power ( $\beta=8$  and  $\beta=11$ , respectively) that approximated a scale-free network topology ( $R^2>0.90$ ), to generate an adjacency matrix. A topological overlap measure (TOM) was calculated to assess transcript interconnectedness. A dissimilarity measure was calculated from the TOM and was subsequently used for average linkage hierarchical clustering. Module definition parameters included a minimum module size of 35 genes, *DeepSplit 4*, and a minimum module merge height of 0.8.

Following module definition, the first principal component of each module – the module eigengene (ME) – was calculated as a synthetic gene representing the expression profile of all genes within a given module. Modules are named by a conventional color scheme and then correlated to AD case-status, matching demographics and relevant covariates. Statistical significance was assessed at Bonferroni-adj.  $p \leq 0.05$  (corrected for number of tested modules).

To identify the set of genes with a high module membership and phenotype association, (i.e. the hub genes), we applied two selection criteria: 1) genes with the high intra-modular connectivity ( $r^2 \geq 0.7$ ) and 2) significantly correlated with AD(36).

### **Gene Set Enrichment Analysis**

Gene set enrichment analysis (GSEA) was used to detect known biological processes and pathways enriched within the PCG modules using GSEA v2.2.3 software from the Broad Institute as previously described(37;38). Individual gene lists for each of the PCG modules significantly correlated with AD were generated by rank-ordering all differentially expressed PCG by their module membership (MM) to each of the AD-associated modules. Prior to running GSEA, the transcript IDs were converted to HUGO Gene Nomenclature Committee (HGNC)(39). We derived the *a priori* gene sets from the Molecular Signatures Database v6.2 (MSigDB; <http://www.broadinstitute.org/gsea/msigdb>) from the Broad Institute. A total of 1329 gene sets from the Canonical Pathways subset of the C2: Curated Pathways collection of MSigDB were assessed. Default parameters were then applied to give a minimum and maximum *a priori* gene set size between 15 and 500 genes, respectively. The identified enriched pathways were further adjusted for multiple testing at FDR of 25%.

### **Correlation Analyses**

The expression values of lncRNA and PCG hubs from the significant modules, were correlated (Pearson  $r$ ) with each and adjusted at FDR of 5%, separately for the negative and positive correlations. To better understand the biological significance of these correlations, we performed



gene enrichment analysis, in the Co-lncRNA webtool (<http://bio-bigdata.hrbmu.edu.cn/Co-LncRNA/>) using KEGG pathways. The significance of the enrichment analysis was assessed by hypergeometric test and further adjusted for multiple testing at FDR of 10%(40).

### **eQTL Detection**

The genotype calls were generated as part of a larger meta-GWAS study(22) and were integrated with the lncRNA and PCG hubs expressions to identify expression quantitative trait loci (eQTLs) for the lncRNA and PCG. Following a previously described approach and to retain power only local, cis-eQTLs, were assessed(2). Specifically, SNPs located 1 mega base pairs (Mbp) upstream and downstream from the selected lncRNA and PCG hubs were filtered with Plink v1.07 to exclude variants in LD ( $R^2 \geq 0.7$ )(41). To reliably estimate the eQTL effects in a sample size of 65, we further considered only SNPs with a minor allele frequency (MAF)  $\geq 10\%$ . After LD pruning we retained 58 317 SNPs which were tested as eQTLs. SNP impact on gene expression was detected by MatrixEQTL software package in R in using a linear regression framework and adjusting for the potential effects of the first 5 PCs(42). The significant eQTL results were adjusted for multiple testing at FDR of  $q \leq 0.3$ .

### **Test for GWAS association signals enrichment**

The assessment of enrichment for low p-values was performed by using the SST test(43). Briefly, for the analysis we used the latest data from the Psychiatric Genomic Consortium (PGC) GWAS of AUD(44). As the postmortem brain sample is composed of subjects with European (EU) ancestry, for our analysis we used the EU sample of 46K subjects (Suppl. Methods).

## **Results**

### **Chronic alcohol consumption leads to generalized gene expression changes between cases and controls**

At the nominal  $p \leq 0.05$  we identified a total of 2,859 probes differentially expressed between AD cases and controls, representing 676 lncRNA and 2,135 PCG that comprise 3.4% and 11% of the total gene pool assayed, respectively. Similar to previous studies, the overall number of differentially expressed genes was greater than expected by chance (hypergeometric  $p = 1.3 \times 10^{-5}$ ) suggesting that chronic alcohol intake leads to generalized changes in the brain transcriptome(2;45). At FDR of 5% we identified 69 lncRNA and 309 PCG. Interestingly among these we also identified a few pseudogenes with evidence for differential expression. An unsupervised hierarchical clustering of the standardized expression values (i.e., values shift to a mean of 0 and standard deviation of 1) of all differentially expressed PCG and lncRNA genes at the nominal  $p \leq 0.05$  showed general patterns of association between gene expression and diagnosis (Suppl. Fig.2A and 2B). The significant results from the univariate gene expression analyses are provided in supplementary table (Suppl. Table 2).

### **lncRNA and PCG show a disease relevant network pattern**

While the gene expression analysis identified differentially expressed genes in NAc of subjects with AD, these do not provide an integrative view of the interaction between the lncRNA and mRNA genes. Therefore, we performed a weighted gene co-expression network analysis (WGCNA)(46;47) separately on the nominally expressed lncRNA and PCG at  $p \leq 0.05$ . We chose this threshold in order to: **i)** include genes with smaller effect size (which otherwise would be excluded with more stringent statistical criteria), **ii)** enrich for genes likely to play role in AD, and **iii)** retain a sufficient number of genes for building of gene co-expression networks. In the lncRNA network analysis, we identified a total of 5 modules (Fig. 1)(46), of which three modules ( $M_{brown}$ ,  $M_{blue}$ , and  $M_{grey}$ ) were significantly correlated with AD at a Bonferroni adj.  $p \leq 0.01$ . In the PCG network analysis, we identified 11 modules, five of which were significantly correlated with AD at a Bonferroni adj.  $p \leq 0.005$  (Fig.2). In addition to the main dichotomous case/control status, we also tested additional quantitative alcohol related phenotypes such as age of initiation of alcohol drinking, amount of daily alcohol consumption and years of drinking. We identified one module ( $M_{green}$ ) and two modules ( $M_{brown}$  and  $M_{green}$ ) as significantly correlated with amount of daily alcohol consumption at a Bonferroni adj.  $p \leq 0.05$  in the

lncRNA and PCG analyses, respectively. Interestingly, two of the five PCG modules were significantly correlated with both AD and amount of daily alcohol consumption, while in the lncRNA analysis, we did not observe overlap between modules associated with AD (i.e.  $M_{brown}$  and  $M_{blue}$ ) and daily alcohol consumption ( $M_{green}$ ). Full tables with module size, correlations and p-values for all PCG and lncRNA modules correlated with AD and daily alcohol consumption are provided in supplementary tables (Suppl. Tables 3 and 4).

To ensure the robustness of our gene co-expression networks and reduce the potential influence of outlier samples on network structure, we used the robust ‘*bootstrapped*’ version of WGCNA (rWGCNA). We performed 100 iterations in which networks were created after randomly subsetting 2/3 of the total samples as previously suggested(48). The resulting 100 networks were then merged into one large, final consensus network; the individual sub-networks showed reasonably high consistency with the final lncRNA and mRNA networks (Suppl. Fig.3A and 3B).

In a scale-free network topology, ‘hubs’ are the most highly connected genes (of which there are relatively few among all the nodes within a network); thus, we also identified the hub genes for the significant modules. Of the three lncRNA modules associated with AD,  $M_{blue}$  was the largest containing 200 genes,  $M_{brown}$  contained 105 genes and  $M_{grey}$  73 genes. As the genes in  $M_{grey}$  are unassigned we attempted to identify hubs only in  $M_{blue}$  and  $M_{brown}$ . Of the 305 transcripts clustered in the two modules, 70 transcripts were considered as candidate hubs, while among the five PCG modules we identified a larger number of hubs (N=368).

### **AD gene modules are enriched in alcohol related processes**

Previous studies have shown that co-expressed genes are enriched for biologically relevant functions [49-51]. We used a gene set enrichment analysis (GSEA) to assess for enrichment of cellular process and biological functional categories in modules associated with AD. The gene lists for each module were generated by ranking all 2185 differentially expressed transcripts according to their MM to each of the five significant modules as previously described(49). Using the default parameters

in GSEA, at FDR of 25%, we identified 38 *a priori* gene sets significantly enriched in four of the five PCG modules associated with AD (Table 1). Among these,  $M_{turquoise}$  and  $M_{greenyellow}$ , showed the highest and  $M_{green}$  the lowest numbers of enriched GO terms, respectively. The 4 modules showed distinct patterns of enrichment, with  $M_{turquoise}$  enriched for gene sets involved in neurodegenerative disorders (i.e., Alzheimer, Parkinsons and Huntingtons diseases) as well as gene sets enriched for neuronal system, neurotrophins signaling and oxidative stress, while  $M_{tan}$  and  $M_{greenyellow}$  were enriched for immune related processes and for genes involved in metabolic processes among others.

### **lncRNA and PCG show a complex pattern of interactions**

Since lncRNA can function as potential molecular “scaffolders”(50;51), i.e. by bringing different sets of genes near each other, we were interested to identify PCG hubs significantly correlated with lncRNA hubs. Limited studies have shown that lncRNA can affect gene functions by interfering with the expression of their specific gene targets(52). We integrated the lncRNA and PCG hubs by correlating the expression values of lncRNA and PCG hubs across the significant modules. At FDR of 5% we observed 5,404 correlations, of which the number of positive correlations (N=3,150) significantly exceeded the number of negative (N=2,254) correlations (Mann-Whitney U test  $p=1E-36$ ). In these analyses, we observed generalized as well as module specific correlations. For example, hubs from the blue and brown lncRNA modules showed distinct either negative or positive correlations, respectively with hubs from the black PCG module (Fig.3A and 3B). Similarly, hubs from the blue lncRNA module were exclusively positively correlated with the hubs from  $M_{turquoise}$  PCG module, while hubs from the brown lncRNA module were negatively correlated with  $M_{turquoise}$ . We further observed that the unique module correlations also drove the strongest positive and negative individual lncRNA/PCG hubs correlations. For example, the strongest negative correlation (Pearson  $r=-0.72$ ,  $p=1.63E-11$ ,  $q=2.07E-8$ ) was observed between lncRNA (G075391) a hub gene in the brown lncRNA module on chromosome 7 and VPS51 (a member of the vacuolar protein sorting-associated protein 51 family) a hub from  $M_{turquoise}$  on chromosome 11. Further exploring the negative correlation between these two hubs we observed a moderate mediating impact of G075391 on the expression of

VPS51 between cases and controls (ANCOVA,  $F=5.07$ ,  $df=1$ ,  $p=0.028$ ). In the gene expression analysis, G075391 was overexpressed in the alcohol subjects, while VPS51 was underexpressed (Fig. 4) suggesting that one potential mechanism by which G075391 contributes to the neuropathology of AUD is by reducing the expression of VPS51. The entire list of positive and negative lncRNA/PCG hub correlations at FDR of 5% is provided in supplementary table (Suppl. Table 5).

To better understand the overall functional role of the two significant lncRNA modules, we performed a pathway enrichment analyses using the Co-lncRNA webtool(40) for the negatively and positively correlated lncRNA and PCG modules. We observed distinct pathway enrichments, in which PCG modules negatively correlated with the lncRNA modules ( $M_{blue}$ ) were enriched for pathways related to the complement system, cell adhesion and toll-like receptors, while the positively correlated PCG modules were enriched for pathways belonging to neurodegenerative disorders such as Parkinson's, Alzheimer and Huntington disease and in pathways involved in oxidative phosphorylation, long-term potentiation among others. PCG modules positively correlated with lncRNA  $M_{brown}$  module were enriched for lysosome trafficking, while PCG modules negatively correlated with lncRNA  $M_{brown}$  were enriched for genes involved in calcium signaling, long-term potentiation and neurotrophin signaling (Suppl Figs. 4A-4O). The PCG  $M_{brown}$  significantly correlated with daily alcohol consumption and negatively correlated with lncRNA  $M_{green}$  was enriched for gene pathways involved in focal adhesion, MAPK signaling, peroxisome (Suppl. Figs. 5A-5D).

### **Genetic variants affect lncRNA and PCG expression in a disease specific manner**

To understand the underlying genetic mechanisms of AD risk polymorphisms we further integrated the lncRNA and PCG hubs expression data from our significant modules with previously collected genotypic data(22). Due to the small sample size, we focused on testing cis-eQTLs (defined within 1Mbp up- and down-stream from the tested loci) only. At FDR of  $q \leq 0.3$  we identified 293 eQTLs that impact hubs expression, with disproportionate number of eQTLs for the PCG ( $n=282$ ) vs.

lncRNA (n=11) hubs (Suppl. Table 6). In a follow up analysis, we further tested these 293 eQTLs for an interaction between genotype and disease status; at FDR of 5% we identified 31 interactions that mediate the expression of 30 PCG hubs, and one lncRNA hub (G054549) on Chr. 3 (Table 2). The most significant interaction we observed was between FKBP prolyl isomerase 5 (FKBP5) and rs9394312 on Chr. 6 (Fig.5).

### **GWAS signals of AUD show suggestive enrichment in our lncRNA specific eQTLs**

While we and others have shown alcohol related eQTLs are enriched for GWAS signals of AUD and other alcohol related phenotypes (ARPs) in the protein coding genome(53), no such studies have been performed to interrogate for such enrichment in lncRNA genes. To increase power of our test and be rather inclusive, we selected all eQTLs significant at the nominal  $p \leq 0.05$ . At this threshold level we have identified a total of 3064 eQTLs (366 lncRNA and 2698 PCG specific eQTLs). The assessment of enrichment was performed by using the SST test (Suppl. Text) and we detected only a suggestive enrichment ( $p=0.16$ ) of AUD signals, most likely due to the underpowered alcohol PGC sample and our own postmortem brain sample.

### **Discussion**

The main goal of this study is to profile the expression patterns of the non-coding and coding transcriptome of NAc in a large sample of subjects with AD and controls. The NAc is a central component of the mesocorticolimbic system (MCL) and has been shown to be involved in addictive behaviors(54-56). By integrating GWAS data previously collected on the sample(22) with our expression data, we further attempted to reveal hitherto unknown relationships between lncRNA and PCG and to assess how this relationship is modulated by genetic variants in the brain. Unsurprisingly and in agreement with previous alcohol related postmortem brain expression studies, we identified differentially expressed PCG, suggesting that chronic alcohol consumption is associated with widespread transcriptomic changes in the brain. We further identified numerous lncRNA differentially expressed between alcoholic cases and control, supporting their involvement in the neuroadaptations

associated with chronic alcohol consumption. Among the most significant differentially expressed PCG, were serpin peptidase inhibitor, clade A (alpha-1 antiproteinase, antitrypsin), member 3 (SERPINA3), interferon induced transmembrane protein 2 and 3 (IFITM2 and IFITM3) and solute carrier family 14 (urea transporter), member 1 (Kidd blood group) (SLC14A1), that were also identified from previous alcohol related postmortem brain gene expression studies(9;57).

Interestingly, we also detected a few differentially expressed pseudogenes, such as the annexin A2 pseudogene 2 and 3 (ANXA2P2 and ANXA2P3) and interferon induced transmembrane protein 4 pseudogene (IFITM4P) on chromosomes 9, 10 and 6, respectively. Previous postmortem brain expression studies have shown ANXA2P2 to be involved in stress response pathways in chronic alcoholics(57), however, little is known about the functions of ANXA2P3 and IFITM4P; it appears that ANXA2P3 is involved in reducing lipids levels in response to statins(58) and in chronic obstructive pulmonary disease (COPD)(59), while no known functions were reported for IFITM4P.

A major limitation of the single gene expression analysis to identify and prioritize a set of genes associated with a given phenotype, is its inability to consider the complex molecular interactions between such identified genes(60); this is especially relevant in studying the non-coding transcriptome, which is poorly annotated, with many lncRNA genes still of unknown function. To address this limitation, we performed a weighted gene co-expression analysis (WGCNA), which allowed us to identify a set of co-regulated PCG and lncRNA. We identified three lncRNA modules and four PCG modules that were significantly correlated with AD. Among the significant lncRNA modules correlated with AD status was  $M_{grey}$ . Genes in the grey module are frequently considered as 'noise', i.e. genes whose expression does not correlate with genes in the other modules, although there are suggestions that this interpretation may not always be accurate(61). In general, the genes in the grey module are usually ubiquitously expressed, exhibiting oscillating or highly variable patterns of expression; of course these could also be simply assigned to the wrong module(62). Regardless, one potential explanation for our observation could be that, at least some lncRNA, may impact the neuropathology of AD in isolation and not as a part of gene network. For example, other studies have



also reported similar observation, where despite of their unassigned status, genes in  $M_{grey}$  show significant disease associations in certain phenotypes(63;64). Using the available quantitative measures of alcohol consumption, we further identified one lncRNA module and two PCG modules significantly correlated with amount of daily alcohol consumption after correction for multiple testing. Interestingly, while we observed same PCG modules to be significantly correlated with both AD status and quantitative alcohol phenotype, no such relationship was revealed for the lncRNA module, suggesting that different sets of lncRNA genes may impact these related, yet distinct, measures of alcohol related phenotypes. To further understand the potential regulatory functions of lncRNA, we performed a series of correlation analyses between the hub genes identified from the significant lncRNA and PCG modules. In these analyses we observed highly significant positive and negative correlations, in which the positive correlations significantly outnumbered the negative correlations; this is not entirely surprising, considering that the positive correlation can reflect both a genuine regulatory function as well as co-expression patterns between lncRNA and PCG. We further observed that the module specific correlations were driven exclusively by lncRNA belonging to individual modules, suggesting that individual modules are likely to contain a set of lncRNA with different and non-overlapping functions. Indeed, in our pathway enrichment analyses we observed the PCG modules negatively or positively correlated with the lncRNA modules are enriched for distinct and mostly non-overlapping biological processes, further corroborating the suggestion that lncRNA involved in the neuroadaptation to alcohol consumption likely have non-overlapping functions. From our GSEA analysis, we observed that similarly to other studies(2;45;65), some of the PCG modules are also enriched for immune related or neurodegenerative processes. Immune related responses to alcohol consumption in the brain has been well documented(66;67). Likewise, the neurodegenerative processes observed for some of our modules may reflect the nature of our postmortem sample composed exclusively from chronic alcoholics. This is not surprising considering that our sample is composed of subjects that have been exposed to alcohol for over two decades. Both animal and human genetic models have demonstrated that prolonged exposure to alcohol leads



to activation of the microglial population with the concurrent activation of immune related processes in the brain(68;69). It has been well known, for over several decades now, that prolonged and excessive alcohol drinking leads to loss of a brain matter(70;71), and consequently activation of genes involved in neurodegenerative disorders.

Integrating our expression and genetic data led to identification of eQTLs that affect lncRNA and PCG expression. Having an integrated view on the expression of lncRNA and PCG we were also interested to identify eQTL that can impact both lncRNA and PCG expressions; we, however, failed to observe eQTLs that have a shared impact on lncRNA and PCG expressions. We further observed disproportionate numbers of eQTLs for PCG vs. lncRNA genes. This could reflect either a genuine biological mechanism, or conversely can be due to a lack of sufficient power to reliably identify eQTLs for lncRNA whose expression is associated with AD. Interestingly, among the eQTLs affecting PCG expression, certain polymorphisms showed a strong interaction effect between PCG expression and disease status. Among these, the strongest interaction effect was observed for FKBP5 and rs9394312. Several studies have implicated FKBP5 in the severity of alcohol withdrawal(72), alcohol drinking patterns in rodents(73), problematic drinking(74), as well as direct regulation of FKBP5 expression and phosphorylation by acute ethanol in mouse prefrontal cortex(75;76).

The importance of our postmortem brain expression study to assess lncRNA expression in nucleus accumbens is further supported by three recent alcohol related GWAS reporting genome-wide signals near lncRNA genes: i) a study conducted by Gelernter et al. (2014)(77) that implicated the ADH gene cluster on chromosome 4 and the LOC100507053 locus, ii) a study conducted by the COGA group(78) that identified a polymorphism near LOC151121 on chromosome 2, and iii) a study conducted by our own group that have reported several polymorphisms in LOC339975(22). However, in our study none of these three loci showed evidence for differential expression, which also agrees with our previous study reporting no evidence for differential expression of these loci, although we observed the expression of LOC339975 to be affected by the most significantly associated polymorphism (rs11726136) in NAc.

In summary, the main goal of this study was to test the hypothesis that lncRNA, as a novel class of non-coding RNAs, may contribute to the neuropathology of alcohol dependence. In this study we identified a set of lncRNA and PCG differentially expressed between cases and controls. Our gene network analyses identified lncRNA and PCG modules significantly correlated with AD in NAc, which were shown to be enriched for immune-related processes and neurodegeneration. We further identified distinct patterns of correlation between the lncRNA and PCG hubs with minimal overlap between modules, i.e. either positive or negative correlations, but not mixed. Gene pathway enrichment revealed that of genes whose functions were related to immune, neurological and neurodegenerative processes. Finally, we identified eQTLs that affect the expression of lncRNAs and PCG hubs, with some of these eQTLs showing a clear mediating effect on the PCG expression between cases and controls. Unlike previous studies though, here we saw only suggestive enrichment for association signals among the eQTLs, which could be attributed to either a limited importance of lncRNAs in the etiology of AD, or most likely due to our limited sample size.

While our study is novel in its approach to integrate genetic and molecular data in postmortem alcoholic brains as well as addressing important questions regarding lncRNA involvement in the etiology of AD, it is not without limitations. First, postmortem brain studies are observational as manipulation of living human subjects is not possible. Although the cross-sectional nature of these studies limits the causal inference we can make, we believe the eQTL analysis is a major step toward clarifying the directionality of these observations. Secondly, although our sample size (N=65) is by far the largest postmortem alcohol study to date, in comparison with other publically available postmortem brain expression samples (79) used to study neuropsychiatric disorders such as schizophrenia, bipolar disorder or major depression, is still prohibitively small. However, we believe that with our careful experimental design and implementation of integrative multivariate approaches, we can circumvent some of these limitations and further broaden our understanding of alcohol addiction processes. We hope that our study will provide additional molecular targets that will help translate these advances into effective therapeutic strategies for patients suffering with substance use

disorders. Thus, in conclusion, we believe our study to be important in the field, as to the best of our knowledge, it is among the first such studies to address the role of lncRNA in the neuropathology of alcohol addiction paving the road for future such studies.

## Reference List

- (1) Verhulst B, Neale MC, Kendler KS. The heritability of alcohol use disorders: a meta-analysis of twin and adoption studies. *Psychol Med* 2015 Apr;45(5):1061-72.
- (2) Mamdani M, Williamson V, McMichael GO, Blevins T, Aliev F, Adkins A, et al. Integrating mRNA and miRNA Weighted Gene Co-Expression Networks with eQTLs in the Nucleus Accumbens of Subjects with Alcohol Dependence. *PLoS One* 2015;10(9):e0137671.
- (3) Mayfield RD, Harris RA, Schuckit MA. Genetic factors influencing alcohol dependence. *British Journal of Pharmacology* 2008 May;154(2):275-87.
- (4) Buckley ST, Eckert AL, Dodd PR. Expression and distribution of GABAA receptor subtypes in human alcoholic cerebral cortex. *Annals of the New York Academy of Sciences* 2000;914.
- (5) Fan L, van der Brug M, Chen W, Dodd PR, Matsumoto I, Niwa S, et al. Increased expression of mitochondrial genes in human alcoholic brain revealed by differential display. *Alcoholism, clinical and experimental research* 1999;23(3).
- (6) Flatscher-Bader T, van der Brug M, Hwang JW, Gochee PA, Matsumoto I, Niwa S, et al. Alcohol-responsive genes in the frontal cortex and nucleus accumbens of human alcoholics. *Journal of Neurochemistry* 2005 Apr;93(2):359-70.
- (7) Flatscher-Bader T, van der Brug MP, Landis N, Hwang JW, Harrison E, Wilce PA. Comparative gene expression in brain regions of human alcoholics. *Genes, brain, and behavior* 2006;5 Suppl 1.
- (8) Iwamoto K, Bundo M, Yamamoto M, Ozawa H, Saito T, Kato T. Decreased expression of NEFH and PCP4/PEP19 in the prefrontal cortex of alcoholics. *Neuroscience research* 2004;49(4).
- (9) Lewohl JM, Wang L, Miles MF, Zhang L, Dodd PR, Harris RA. Gene expression in human alcoholism: microarray analysis of frontal cortex. *Alcoholism, clinical and experimental research* 2000;24(12).
- (10) Mayfield RD, Lewohl JM, Dodd PR, Herlihy A, Liu JW, Harris RA. Patterns of gene expression are altered in the frontal and motor cortices of human alcoholics. *Journal of Neurochemistry* 2002 May;81(4):802-13.
- (11) Sutherland GT, Sheedy D, Sheahan PJ, Kaplan W, Kril JJ. Comorbidities, Confounders, and the White Matter Transcriptome in Chronic Alcoholism. *Alcoholism, clinical and experimental research* 2014.
- (12) Flatscher-Bader T, Harrison E, Matsumoto I, Wilce PA. Genes associated with alcohol abuse and tobacco smoking in the human nucleus accumbens and ventral tegmental area. *Alcoholism, clinical and experimental research* 2010;34(7).
- (13) Ron D, Messing RO. Signaling pathways mediating alcohol effects. *Current topics in behavioral neurosciences* 2013;13.
- (14) Jarroux J, Morillon A, Pinskaya M. History, Discovery, and Classification of lncRNAs. *Adv Exp Med Biol* 2017;1008:1-46.
- (15) Han P, Chang CP. Long non-coding RNA and chromatin remodeling. *RNA Biol* 2015;12(10):1094-8.
- (16) Clark BS, Blackshaw S. Long non-coding RNA-dependent transcriptional regulation in neuronal development and disease. *Front Genet* 2014;5:164.

- (17) Du Z, Sun T, Hacisuleyman E, Fei T, Wang X, Brown M, et al. Integrative analyses reveal a long noncoding RNA-mediated sponge regulatory network in prostate cancer. *Nat Commun* 2016 Mar 15;7:10982.
- (18) Shan Y, Ma J, Pan Y, Hu J, Liu B, Jia L. LncRNA SNHG7 sponges miR-216b to promote proliferation and liver metastasis of colorectal cancer through upregulating GALNT1. *Cell Death Dis* 2018 Jun 18;9(7):722.
- (19) Wang A, Wang J, Liu Y, Zhou Y. Mechanisms of Long Non-Coding RNAs in the Assembly and Plasticity of Neural Circuitry. *Front Neural Circuits* 2017;11:76.
- (20) Bohnsack JP, Teppen T, Kyzar EJ, Dzitoyeva S, Pandey S. The lncRNA BDNF-AS is an epigenetic regulator in the human amygdala in early onset alcohol use disorders. *Transl Psychiatry* 2019;9(34):1-11.
- (21) Zuo L, Tan Y, Wang Z, Wang KS, Zhang X, Chen X, et al. Long noncoding RNAs in psychiatric disorders. *Psychiatr Genet* 2016 Jun;26(3):109-16.
- (22) Adkins AE, Hack LM, Bigdeli TB, Williamson VS, McMichael GO, Mamdani M, et al. Genomewide Association Study of Alcohol Dependence Identifies Risk Loci Altering Ethanol-Response Behaviors in Model Organisms. *Alcohol Clin Exp Res* 2017 May;41(5):911-28.
- (23) Xu K, Kranzler HR, Sherva R, Sartor CE, Almasy L, Koesterer R, et al. Genomewide Association Study for Maximum Number of Alcoholic Drinks in European Americans and African Americans. *Alcohol Clin Exp Res* 2015 Jul;39(7):1137-47.
- (24) Li J, Li J, Liu X, Qin S, Guan Y, Liu Y, et al. MicroRNA expression profile and functional analysis reveal that miR-382 is a critical novel gene of alcohol addiction. *EMBO molecular medicine* 2013;5(9).
- (25) Mizuo K, Katada R, Okazaki S, Tateda K, Watanabe S, Matsumoto H. Epigenetic regulation of MIR-124 under ethanol dependence and withdrawal. *Nihon Arukoru Yakubutsu Igakkai zasshi = Japanese journal of alcohol studies & drug dependence* 2012;47(3).
- (26) Pietrzykowski AZ, Friesen RM, Martin GE, Puig SI, Nowak CL, Wynne PM, et al. Posttranscriptional regulation of BK channel splice variant stability by miR-9 underlies neuroadaptation to alcohol. *Neuron* 2008 Jul 31;59(2):274-87.
- (27) Yadav S, Pandey A, Shukla A, Talwelkar SS, Kumar A, Pant AB, et al. miR-497 and miR-302b regulate ethanol-induced neuronal cell death through BCL2 protein and cyclin D2. *J Biol Chem* 2011;286(43).
- (28) Farris SP, Wolen AR, Miles MF. Using expression genetics to study the neurobiology of ethanol and alcoholism. *International review of neurobiology* 2010;91.
- (29) Li H. Systems genetics in "-omics" era: current and future development. *Theory in biosciences = Theorie in den Biowissenschaften* 2013;132(1).
- (30) Nica AC, Dermitzakis ET. Expression quantitative trait loci: present and future. *Philosophical transactions of the Royal Society of London Series B, Biological sciences* 2013;368(1620).
- (31) Hindorff LA, Sethupathy P, Junkins HA, Ramos EM, Mehta JP, Collins FS, et al. Potential etiologic and functional implications of genome-wide association loci for human diseases and traits. *Proc Natl Acad Sci U S A* 2009;106(23).
- (32) Liu C. Brain expression quantitative trait locus mapping informs genetic studies of psychiatric diseases. *Neuroscience bulletin* 2011;27(2).
- (33) Shastry BS. SNPs: impact on gene function and phenotype. *Methods in molecular biology* 2009;578.

- (34) Nica AC, Montgomery SB, Dimas AS, Stranger BE, Beazley C, Barroso I, et al. Candidate causal regulatory effects by integration of expression QTLs with complex trait genetic associations. *PLoS Genet* 2010;6(4).
- (35) Nicolae DL, Gamazon E, Zhang W, Duan S, Dolan ME, Cox NJ. Trait-associated SNPs are more likely to be eQTLs: annotation to enhance discovery from GWAS. *PLoS Genet* 2010;6(4).
- (36) Ponomarev I, Wang S, Zhang L, Harris RA, Mayfield RD. Gene coexpression networks in human brain identify epigenetic modifications in alcohol dependence. *J Neurosci* 2012 Feb 1;32(5):1884-97.
- (37) Hung JH, Yang TH, Hu Z, Weng Z, DeLisi C. Gene set enrichment analysis: performance evaluation and usage guidelines. *Brief Bioinform* 2012;13(3).
- (38) Subramanian A, Tamayo P, Mootha VK, Mukherjee S, Ebert BL, Gillette MA, et al. Gene set enrichment analysis: a knowledge-based approach for interpreting genome-wide expression profiles. *Proc Natl Acad Sci U S A* 2005;102(43).
- (39) Gray KA, Daugherty LC, Gordon SM, Seal RL, Wright MW, Bruford EA. Genenames.org: the HGNC resources in 2013. *Nucleic Acids Res* 2013 Jan;41(Database issue):D545-D552.
- (40) Zhao Z, Bai J, Wu A, Wang Y, Zhang J, Wang Z, et al. Co-LncRNA: investigating the lncRNA combinatorial effects in GO annotations and KEGG pathways based on human RNA-Seq data. *Database (Oxford)* 2015;2015.
- (41) Purcell S, Neale B, Todd-Brown K, Thomas L, Ferreira MA, Bender D, et al. PLINK: a tool set for whole-genome association and population-based linkage analyses. *Am J Hum Genet* 2007 Sep;81(3):559-75.
- (42) Shabalin AA. Matrix eQTL: ultra fast eQTL analysis via large matrix operations. *Bioinformatics* 2012 May 15;28(10):1353-8.
- (43) Levin B. On the Holm, Simes, and Hochberg multiple test procedures. *Am J Public Health* 1996 May;86(5):628-9.
- (44) Walters RK, Polimanti R, Johnson EC, McClintick JN, Adams MJ, Adkins AE, et al. Transancestral GWAS of alcohol dependence reveals common genetic underpinnings with psychiatric disorders. *Nat Neurosci* 2018 Dec;21(12):1656-69.
- (45) Ponomarev I, Wang S, Zhang L, Harris RA, Mayfield RD. Gene coexpression networks in human brain identify epigenetic modifications in alcohol dependence. *J Neurosci* 2012 Feb 1;32(5):1884-97.
- (46) Langfelder P, Horvath S. WGCNA: an R package for weighted correlation network analysis. *Bmc Bioinformatics* 2008;9:559.
- (47) Zhang B, Horvath S. A general framework for weighted gene co-expression network analysis. *Stat Appl Genet Mol Biol* 2005;4:Article17.
- (48) Gandal MJ, Haney JR, Parikshak NN, Leppa V, Ramaswami G, Hartl C, et al. Shared molecular neuropathology across major psychiatric disorders parallels polygenic overlap. *Science* 2018 Feb 9;359(6376):693-7.
- (49) Clarke C, Doolan P, Barron N, Meleady P, O'Sullivan F, Gammell P, et al. Large scale microarray profiling and coexpression network analysis of CHO cells identifies transcriptional modules associated with growth and productivity. *J Biotechnol* 2011 Sep 20;155(3):350-9.
- (50) Guttman M, Donaghey J, Carey BW, Garber M, Grenier JK, Munson G, et al. lincRNAs act in the circuitry controlling pluripotency and differentiation. *Nature* 2011 Aug 28;477(7364):295-300.
- (51) Guttman M, Rinn JL. Modular regulatory principles of large non-coding RNAs. *Nature* 2012 Feb 15;482(7385):339-46.

- (52) Long Y, Wang X, Youmans DT, Cech TR. How do lncRNAs regulate transcription? *Sci Adv* 2017 Sep;3(9):eaao2110.
- (53) Zuo L, Lu L, Tan Y, Pan X, Cai Y, Wang X, et al. Genome-wide association discoveries of alcohol dependence. *Am J Addict* 2014 Nov;23(6):526-39.
- (54) Marty VN, Spigelman I. Effects of alcohol on the membrane excitability and synaptic transmission of medium spiny neurons in the nucleus accumbens. *Alcohol* 2012;46(4).
- (55) Russo SJ, Dietz DM, Dumitriu D, Morrison JH, Malenka RC, Nestler EJ. The addicted synapse: mechanisms of synaptic and structural plasticity in nucleus accumbens. *Trends Neurosci* 2010;33(6).
- (56) Tabakoff B, Hoffman PL. The neurobiology of alcohol consumption and alcoholism: an integrative history. *Pharmacology, biochemistry, and behavior* 2013;113.
- (57) McClintick JN, Xuei X, Tischfield JA, Goate A, Foroud T, Wetherill L, et al. Stress-response pathways are altered in the hippocampus of chronic alcoholics. *Alcohol* 2013 Nov;47(7):505-15.
- (58) Barber MJ, Mangravite LM, Hyde CL, Chasman DI, Smith JD, McCarty CA, et al. Genome-wide association of lipid-lowering response to statins in combined study populations. *PLoS One* 2010 Mar 22;5(3):e9763.
- (59) Wilk JB, Walter RE, Laramie JM, Gottlieb DJ, O'Connor GT. Framingham Heart Study genome-wide association: results for pulmonary function measures. *BMC Med Genet* 2007 Sep 19;8 Suppl 1:S8.
- (60) Wu C, Zhu J, Zhang X. Network-based differential gene expression analysis suggests cell cycle related genes regulated by E2F1 underlie the molecular difference between smoker and non-smoker lung adenocarcinoma. *BMC Bioinformatics* 2013 Dec 17;14:365.
- (61) Saelens W, Cannoodt R, Saeys Y. A comprehensive evaluation of module detection methods for gene expression data. *Nat Commun* 2018 Mar 15;9(1):1090.
- (62) Greenfest-Allen E, Cartailier JP, Magnuson MA, Stoeckert CJ. iterativeWGCNA: iterative refinement to improve module detection from WGCNA co-expression networks. bioRxiv preprint first posted online Dec.14, 2017; doi: <http://dx.doi.org/10.1101/234062> . 12-14-2017.

Ref Type: Online Source

- (63) Li J, Zhou D, Qiu W, Shi Y, Yang JJ, Chen S, et al. Application of Weighted Gene Co-expression Network Analysis for Data from Paired Design. *Sci Rep* 2018 Jan 12;8(1):622.
- (64) Reinhold D, Morrow JD, Jacobson S, Hu J, Ringel B, Seibold MA, et al. Meta-analysis of peripheral blood gene expression modules for COPD phenotypes. *PLoS One* 2017;12(10):e0185682.
- (65) Osterndorff-Kahanek EA, Becker HC, Lopez MF, Farris SP, Tiwari GR, Nunez YO, et al. Chronic ethanol exposure produces time- and brain region-dependent changes in gene coexpression networks. *PLoS One* 2015;10(3):e0121522.
- (66) Crews FT, Qin L, Sheedy D, Vetreno RP, Zou J. High mobility group box 1/Toll-like receptor danger signaling increases brain neuroimmune activation in alcohol dependence. *Biol Psychiatry* 2013 Apr 1;73(7):602-12.
- (67) Kelley KW, Dantzer R. Alcoholism and inflammation: neuroimmunology of behavioral and mood disorders. *Brain Behav Immun* 2011 Jun;25 Suppl 1:S13-S20.
- (68) Cui C, Shurtleff D, Harris RA. Neuroimmune mechanisms of alcohol and drug addiction. *Int Rev Neurobiol* 2014;118:1-12.



- (69) Robinson G, Most D, Ferguson LB, Mayfield J, Harris RA, Blednov YA. Neuroimmune pathways in alcohol consumption: evidence from behavioral and genetic studies in rodents and humans. *Int Rev Neurobiol* 2014;118:13-39.
- (70) Harper C, Kril J. Brain atrophy in chronic alcoholic patients: a quantitative pathological study. *J Neurol Neurosurg Psychiatry* 1985 Mar;48(3):211-7.
- (71) Kubota M, Nakazaki S, Nakazaki S, Saeki N, Yamaura A, Kusaka T. Alcohol consumption and frontal lobe shrinkage: study of 1432 non-alcoholic subjects. *Journal of neurology, neurosurgery, and psychiatry* 2001;71:104-6.
- (72) Huang MC, Schwandt ML, Chester JA, Kirchhoff AM, Kao CF, Liang T, et al. FKBP5 moderates alcohol withdrawal severity: human genetic association and functional validation in knockout mice. *Neuropsychopharmacology* 2014 Jul;39(8):2029-38.
- (73) Qiu B, Luczak SE, Wall TL, Kirchhoff AM, Xu Y, Eng MY, et al. The FKBP5 Gene Affects Alcohol Drinking in Knockout Mice and Is Implicated in Alcohol Drinking in Humans. *Int J Mol Sci* 2016 Aug 5;17(8).
- (74) Dragan WL, Domozych W, Czerski PM, Dragan M. Positive metacognitions about alcohol mediate the relationship between FKBP5 variability and problematic drinking in a sample of young women. *Neuropsychiatr Dis Treat* 2018;14:2681-8.
- (75) Costin BN, Dever SM, Miles MF. Ethanol regulation of serum glucocorticoid kinase 1 expression in DBA/2J mouse prefrontal cortex. *PLoS One* 2013;8(8):e72979.
- (76) Kerns RT, Ravindranathan A, Hassan S, Cage MP, York T, Sikela JM, et al. Ethanol-responsive brain region expression networks: implications for behavioral responses to acute ethanol in DBA/2J versus C57BL/6J mice. *J Neurosci* 2005 Mar 2;25(9):2255-66.
- (77) Gelernter J, Kranzler HR, Sherva R, Almasy L, Koesterer R, Smith AH, et al. Genome-wide association study of alcohol dependence: significant findings in African- and European-Americans including novel risk loci. *Mol Psychiatry* 2014 Jan;19(1):41-9.
- (78) Wetherill L, Agrawal A, Kapoor M, Bertelsen S, Bierut LJ, Brooks A, et al. Association of substance dependence phenotypes in the COGA sample. *Addict Biol* 2015 May;20(3):617-27.
- (79) Fromer M, Roussos P, Sieberts SK, Johnson JS, Kavanagh DH, Perumal TM, et al. Gene expression elucidates functional impact of polygenic risk for schizophrenia. *Nat Neurosci* 2016 Nov;19(11):1442-53.



**Fig. 1** Module-trait relationships for lncRNA. The residuals of the expression values used to generate the lncRNA module MEs are correlated (Pearson) to the dichotomous AD case/control status (Diagnosis) and to quantitative alcohol measures such as daily alcohol consumptions (Alc-Cons), total amount of drinks (Tot\_drinks) and initial age of drinking (Age\_began). The lncRNA modules were also correlated to the first 5 PCs to assess for confounding. P-values shown are unadjusted for multiple testing. After adjusting for number of modules tested, ME<sub>brown</sub>, ME<sub>blue</sub>, and ME<sub>grey</sub>, are significantly correlated with AD case-status (Class) and ME<sub>green</sub> with daily alcohol consumption.

**Fig. 2** Module-trait relationships for protein coding genes (PCG). The PCG module MEs are correlated (Pearson) to the dichotomous AD case/control status (Diagnosis) and to quantitative alcohol measures such as daily alcohol consumptions (Alc-Cons), total amount of drinks (Tot\_drinks) and initial age of drinking (Age\_began). The lncRNA modules were also correlated to the first 5 PCs to assess for confounding. P-values shown are unadjusted for multiple testing. After adjusting for number of modules tested, ME<sub>turquoise</sub>, ME<sub>black</sub>, ME<sub>greenyellow</sub>, ME<sub>tan</sub> and ME<sub>green</sub> are significantly correlated with AD case-status (Class) and ME<sub>brown</sub> and ME<sub>green</sub> also with daily alcohol consumption.

**Fig. 3** Histogram of lncRNA/PCG module correlations. (A) lncRNA ME<sub>brown</sub> shows negative correlation with PCG ME<sub>turquoise</sub>, while lncRNA ME<sub>blue</sub> showed negative correlations with all five significant PCG MEs. (B) PCG ME<sub>black</sub> shows a positive correlation only with lncRNA ME<sub>brown</sub> and PCG ME<sub>turquoise</sub> shows a positive correlation only with lncRNA ME<sub>blue</sub>.

**Fig. 4** Plot of the mediating effect of lncRNA (G075391) on the expression of PCG Vacuolar Protein Sorting-Associated Protein 51 (VPS51) in cases and controls.

**Fig. 5** Plot showing a SNP interaction effect of disease status on the expression of FKBP5. The minor allele of rs9394312 confers a higher FKBP5 expression in controls and lower expression in cases.

**Suppl. Fig. 1** Microarray expression data validation using quantitative PCR. Expression levels of five genes measured by the expression array-based approach were validated using quantitative PCR in all 65 postmortem Nucleus Accumbens (NAc) RNA samples.

**Suppl. Fig. 2** Unsupervised hierarchical clustering of the lncRNA and PCG differentially expressed at  $p \leq 0.05$  was performed on the standardized expression values, which were centered at mean of 0 and SD of 1. The genes were clustered according to the similarity of their expression profile in PGS v.6.6 using complete linkage and Euclidean distance metrics. The color scheme of the Y-axis reflects the clustering based on diagnosis, while the color scheme of the X-axis is an arbitrary identification of the two large clusters.

**Suppl. Fig. 3** Robust, bootstrapped version of WGCNA (rWGCNA). The purpose of rWGCNA is to assess for potential influence of outlier samples on network structure. We performed 100 iterations in which networks were created after first randomly subsetting 2/3 of the total samples. The resulting 100 networks were then merged into one large, final consensus network. The individual sub-networks show consistent structure with each other and the final network for (A) lncRNA and (B) PCG.

**Suppl. Fig. 4** Figures show the enrichment of the PCG hubs positively and negatively correlated with lncRNA hubs in KEGG pathways for AD status. The pathways were derived from the Co-lncRNA web-tool(40). (A) PCG hubs from the  $ME_{green}$  positively correlated with lncRNA  $ME_{blue}$  are enriched for lysosome functions; (B) PCG hubs from the  $ME_{greenyellow}$  negatively correlated with lncRNA  $ME_{blue}$  are enriched for cell adhesions functions; (C) PCG hubs from the  $ME_{tan}$  negatively correlated with lncRNA  $ME_{blue}$  are enriched for genes with functions in complement system; (D) PCG hubs from the  $ME_{tan}$  negatively correlated with lncRNA  $ME_{blue}$  are also enriched for genes involved in Toll-like receptors; (E, F, G) PCG hubs from the  $ME_{turquoise}$  positively correlated with lncRNA  $ME_{blue}$  are enriched for genes involved in neurodegenerative diseases, i.e. Alzheimer's, Huntington and Parkinson; (H, I, J, and K) PCG hubs from the  $ME_{turquoise}$  positively correlated with lncRNA  $ME_{blue}$  are also enriched for genes involved oxidative stress, glioma, long term potentiation, and spliceosome; (L) PCG hubs from the  $ME_{green}$  positively correlated with lncRNA  $ME_{brown}$  are enriched for genes involved in processes related to lysosome functions; (M, N, and O) PCG hubs from the  $ME_{turquoise}$  negatively correlated with lncRNA  $ME_{blue}$  are enriched for genes involved in calcium signaling, long term potentiation and neurotrophin signaling.

**Suppl. Fig. 5** Figures show the enrichment of the PCG hubs positively and negatively correlated with lncRNA hubs in KEGG pathways for daily alcohol consumption. (A, B, C, D) PCG hubs were enriched for processes related to focal adhesion, MAPK signaling, pathways in cancer, and peroxisome functions.

### Module-trait relationships

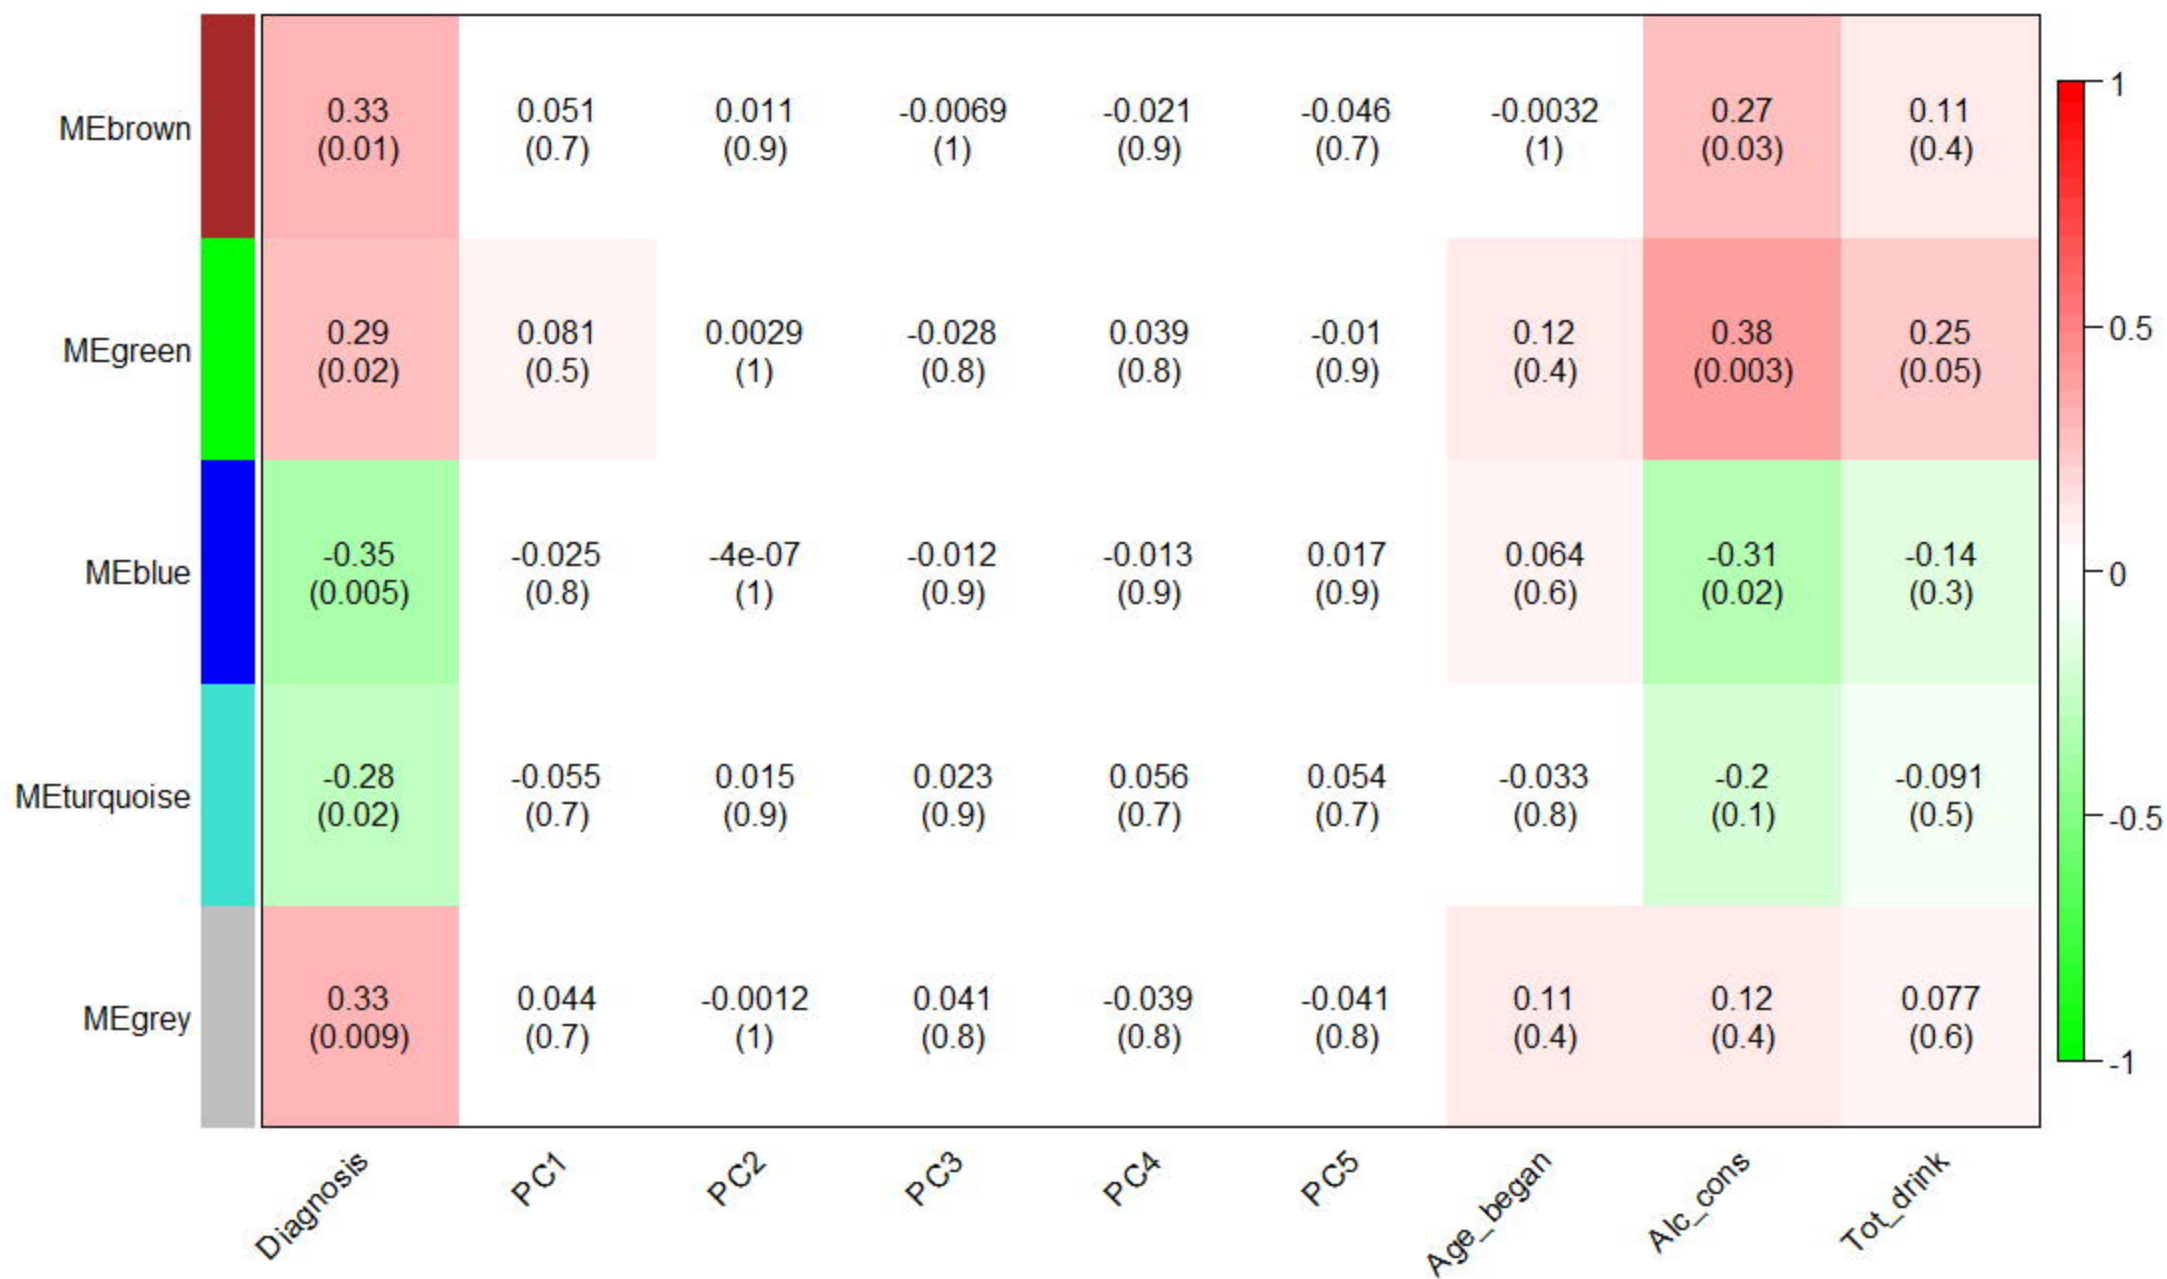

### Module-trait relationships

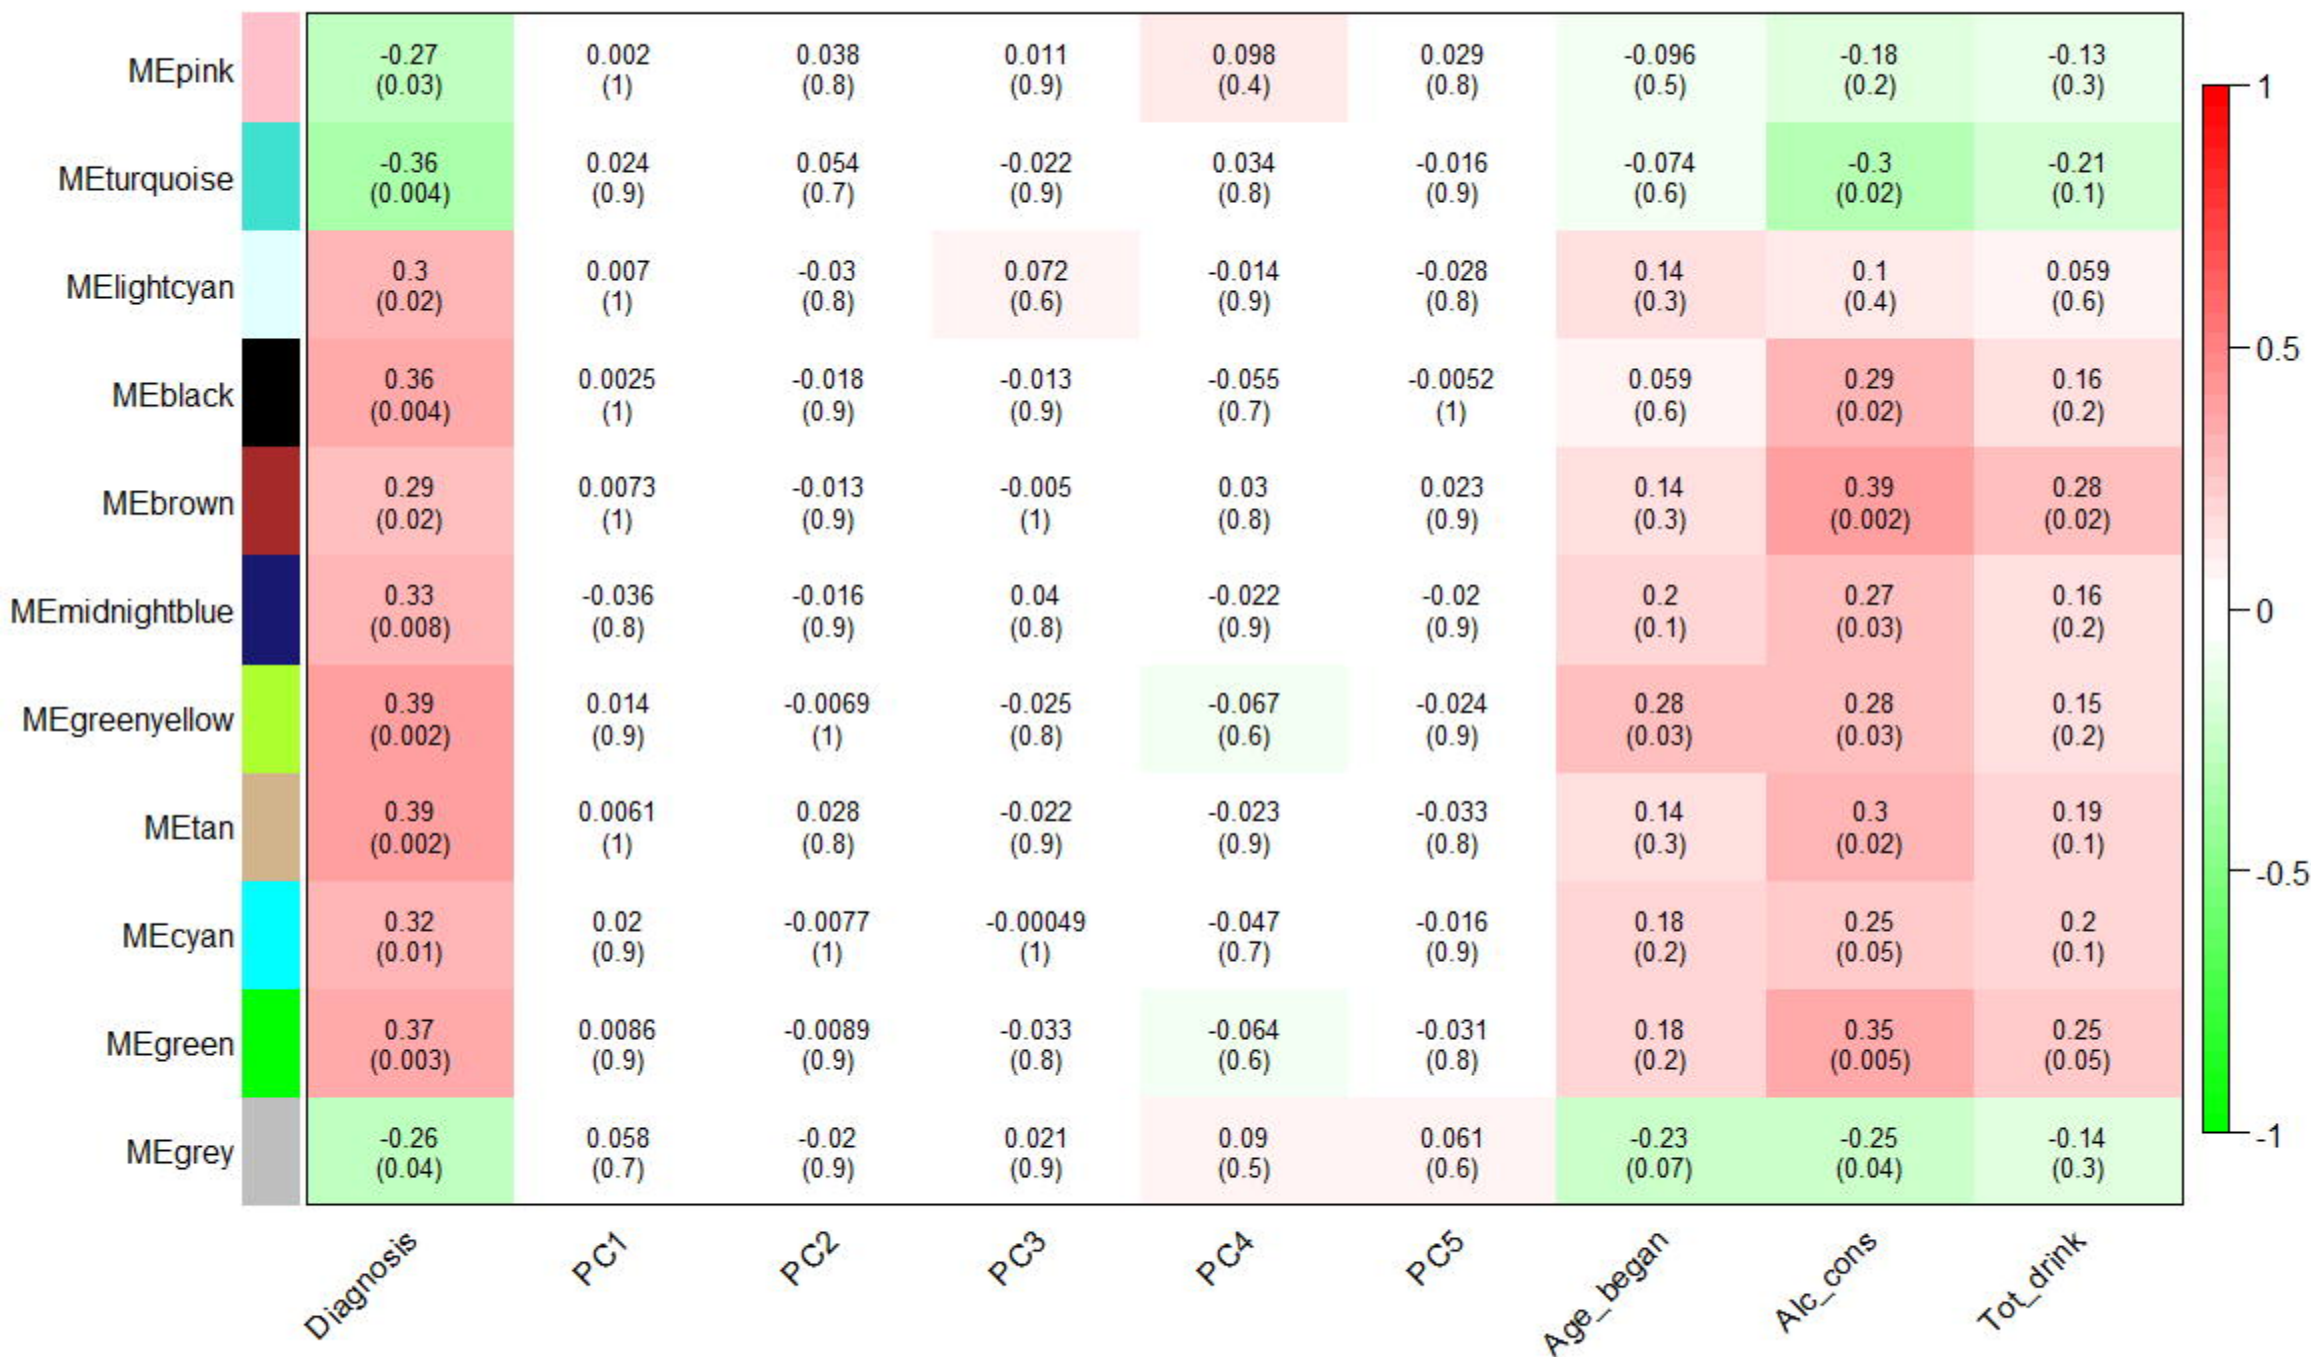



A

### Negative Correlations

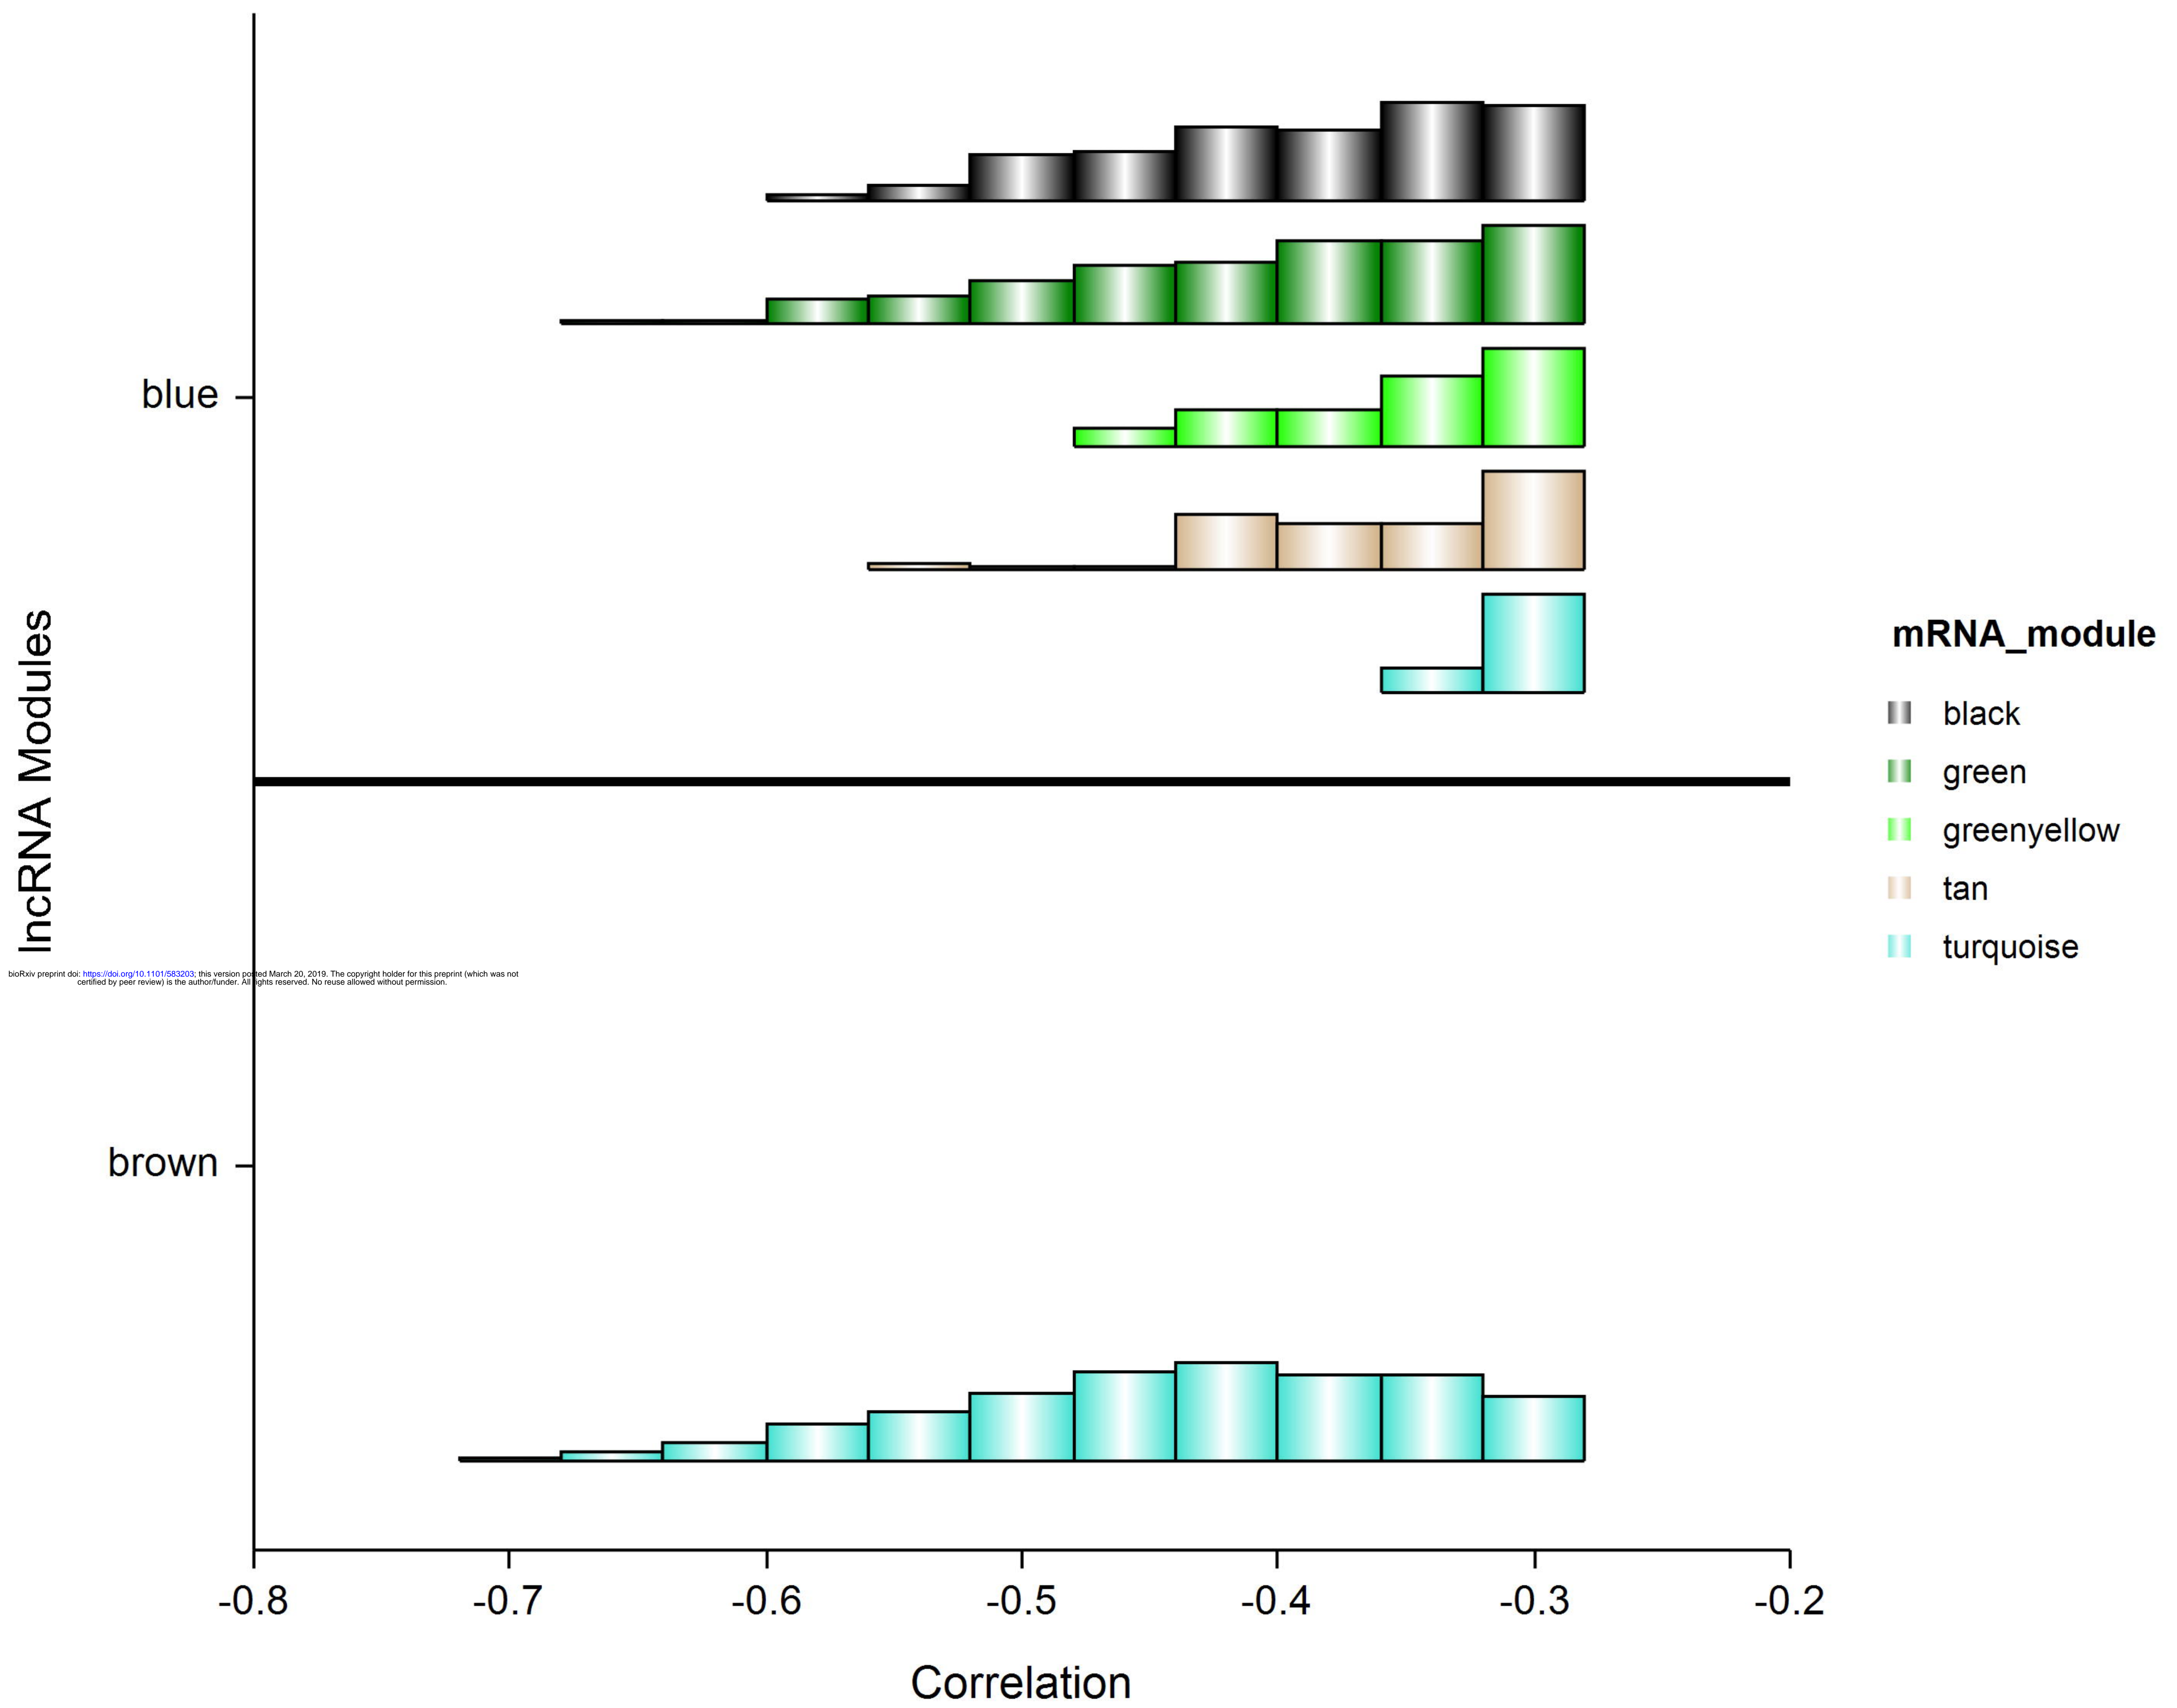

bioRxiv preprint doi: <https://doi.org/10.1101/583203>; this version posted March 20, 2019. The copyright holder for this preprint (which was not certified by peer review) is the author/funder. All rights reserved. No reuse allowed without permission.

**B**

## Positive Correlations

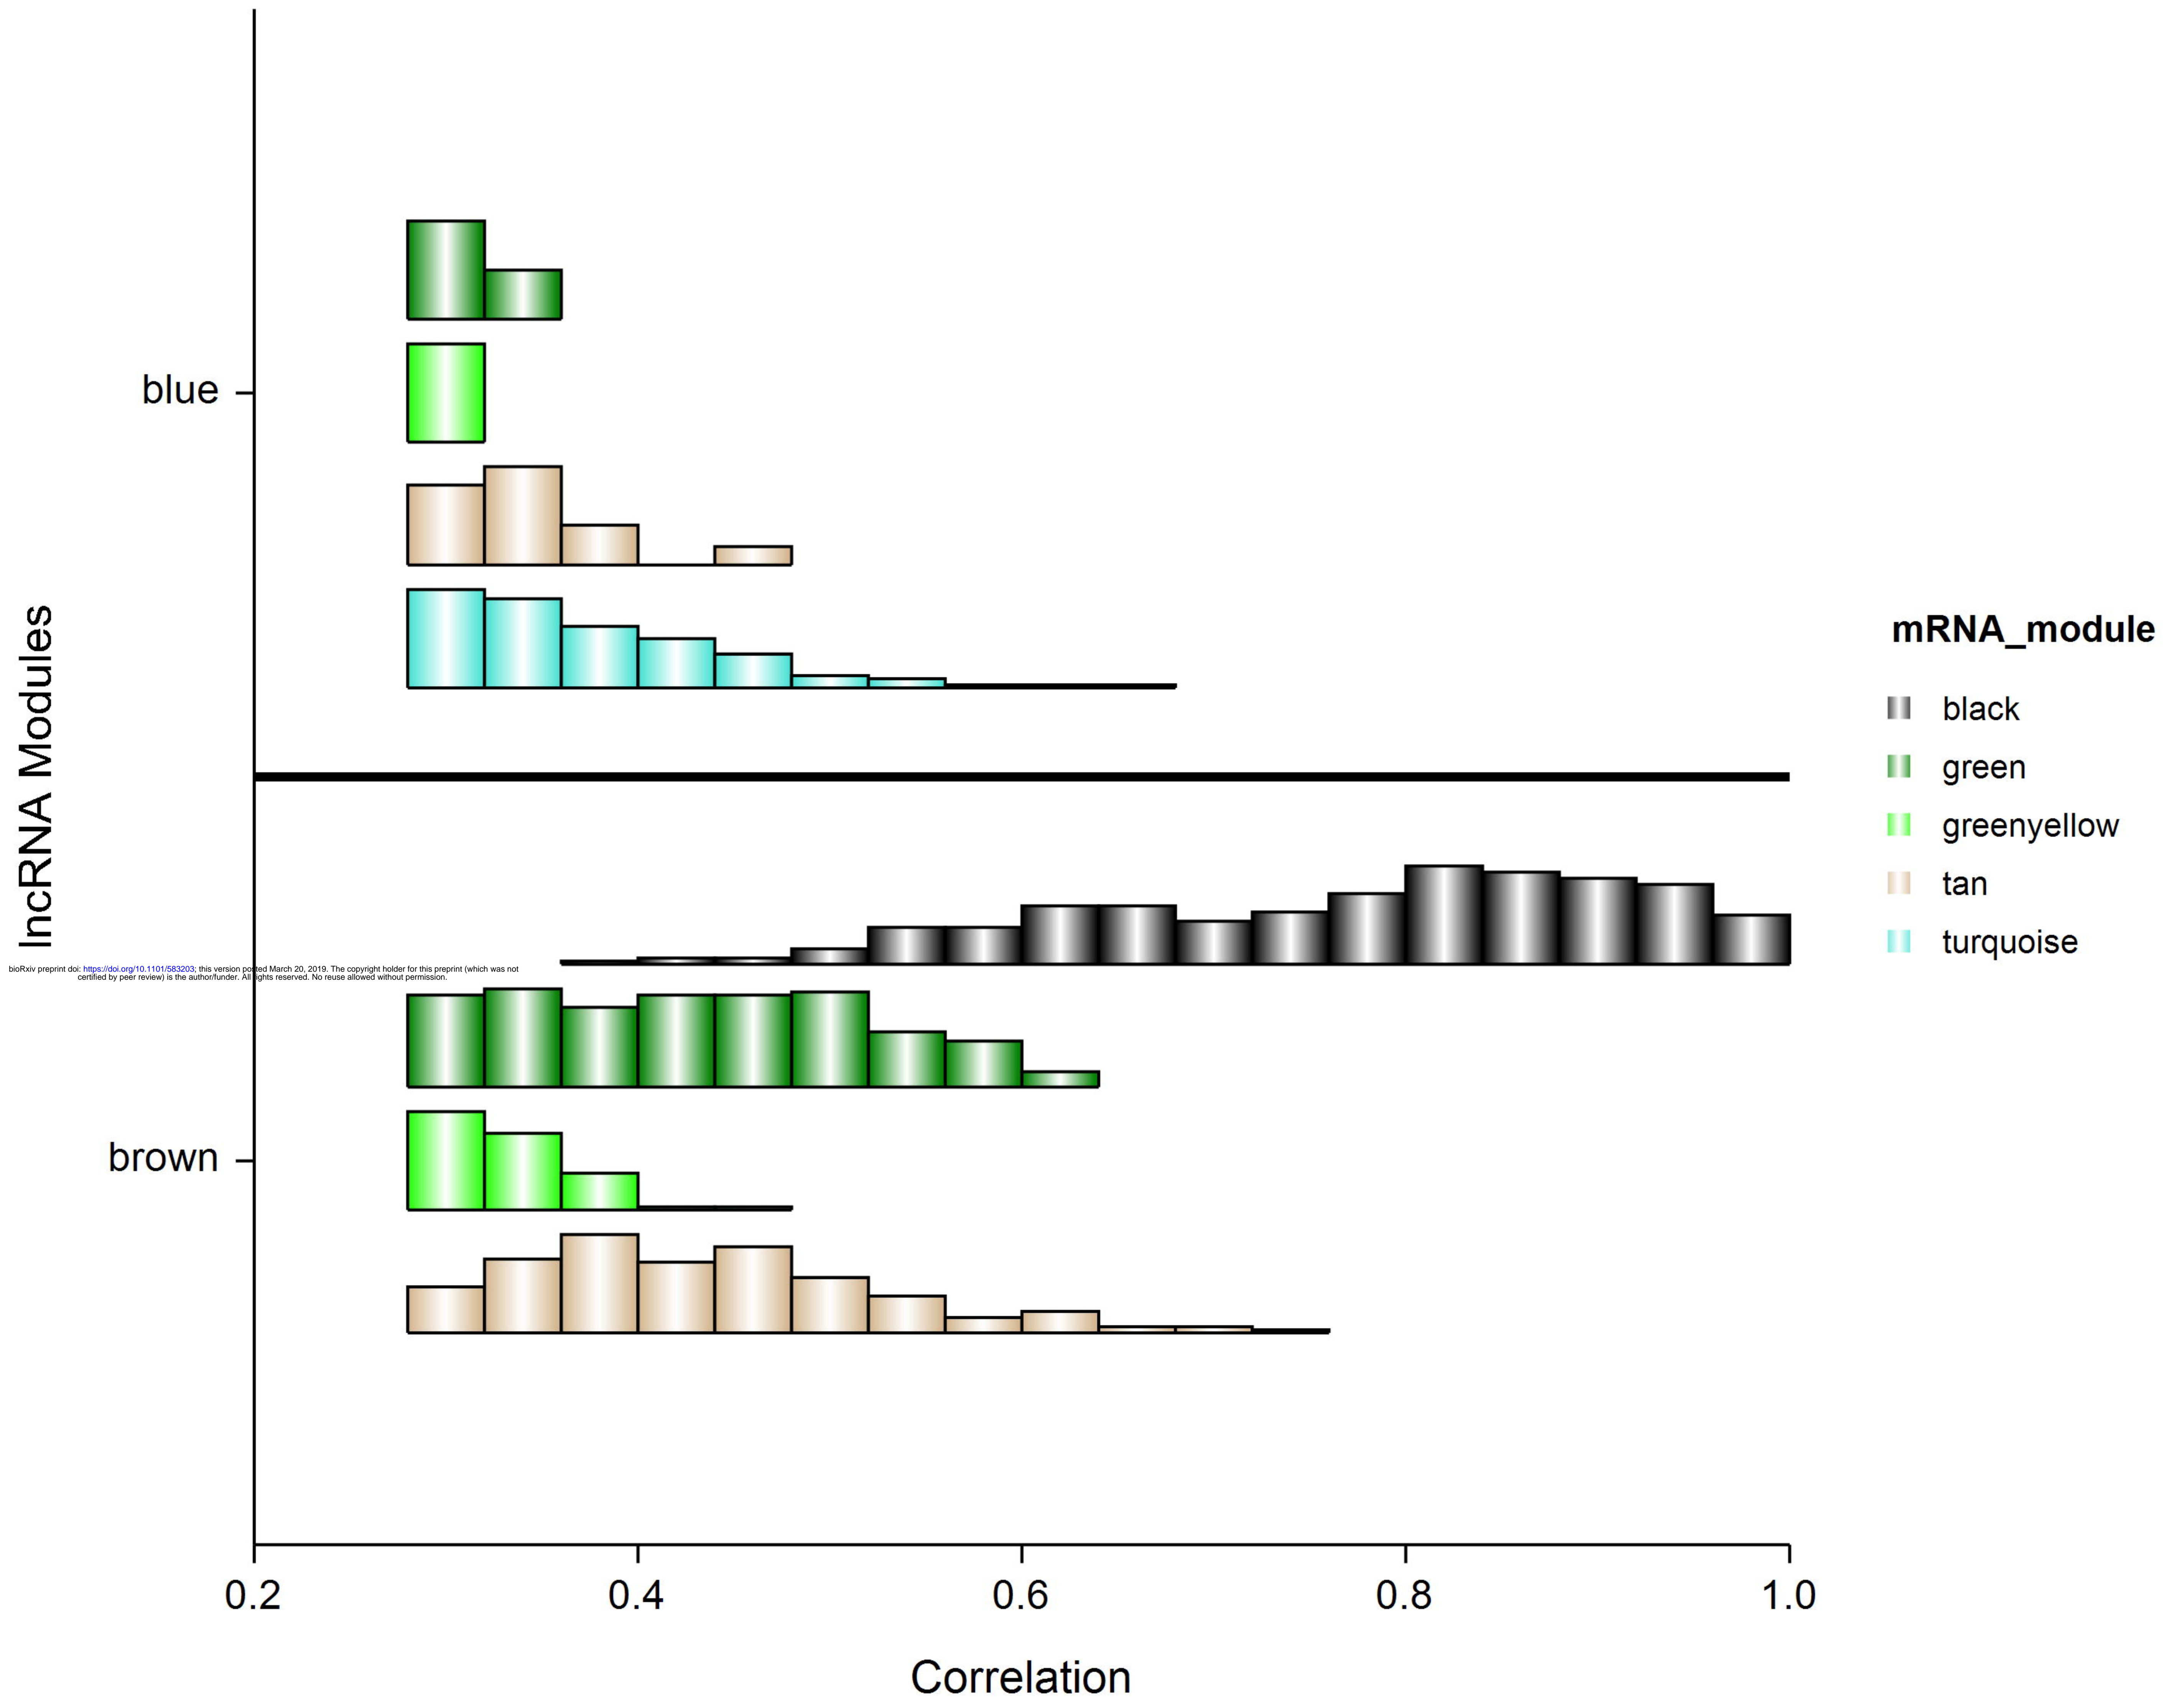

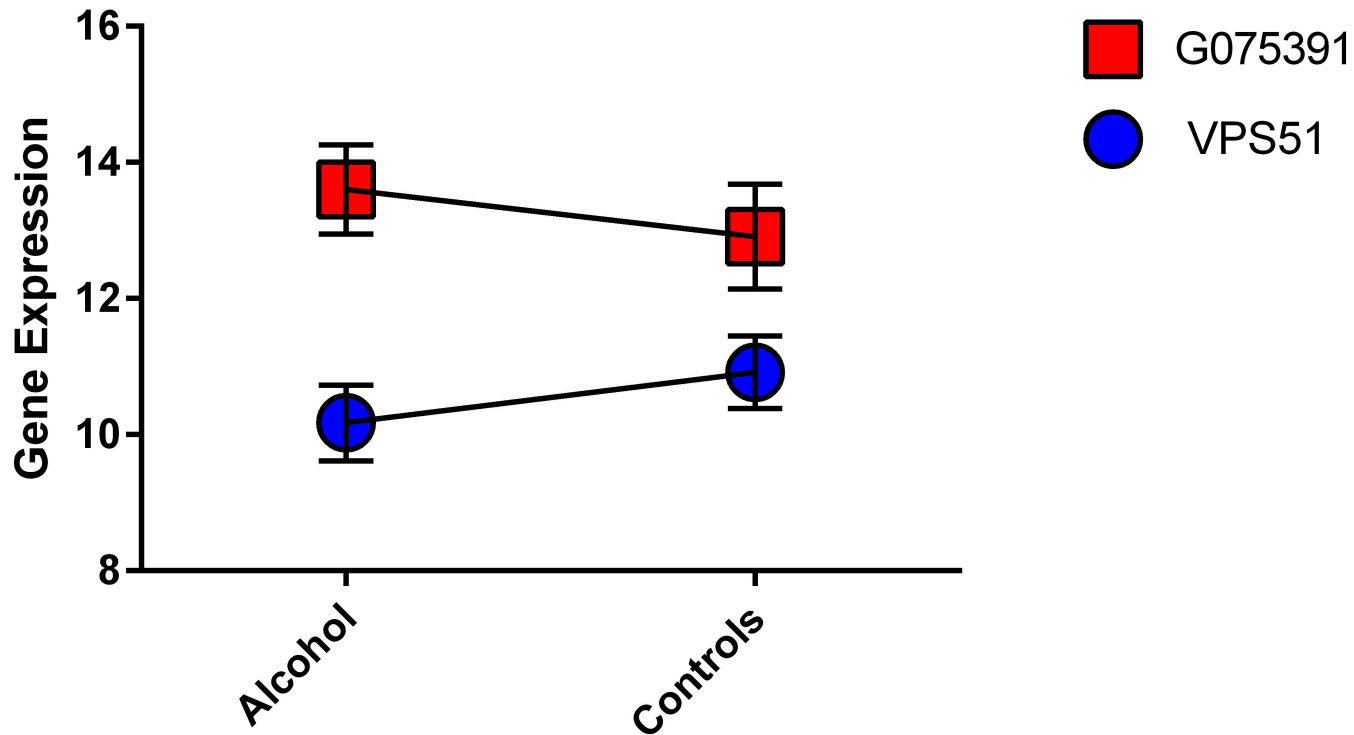



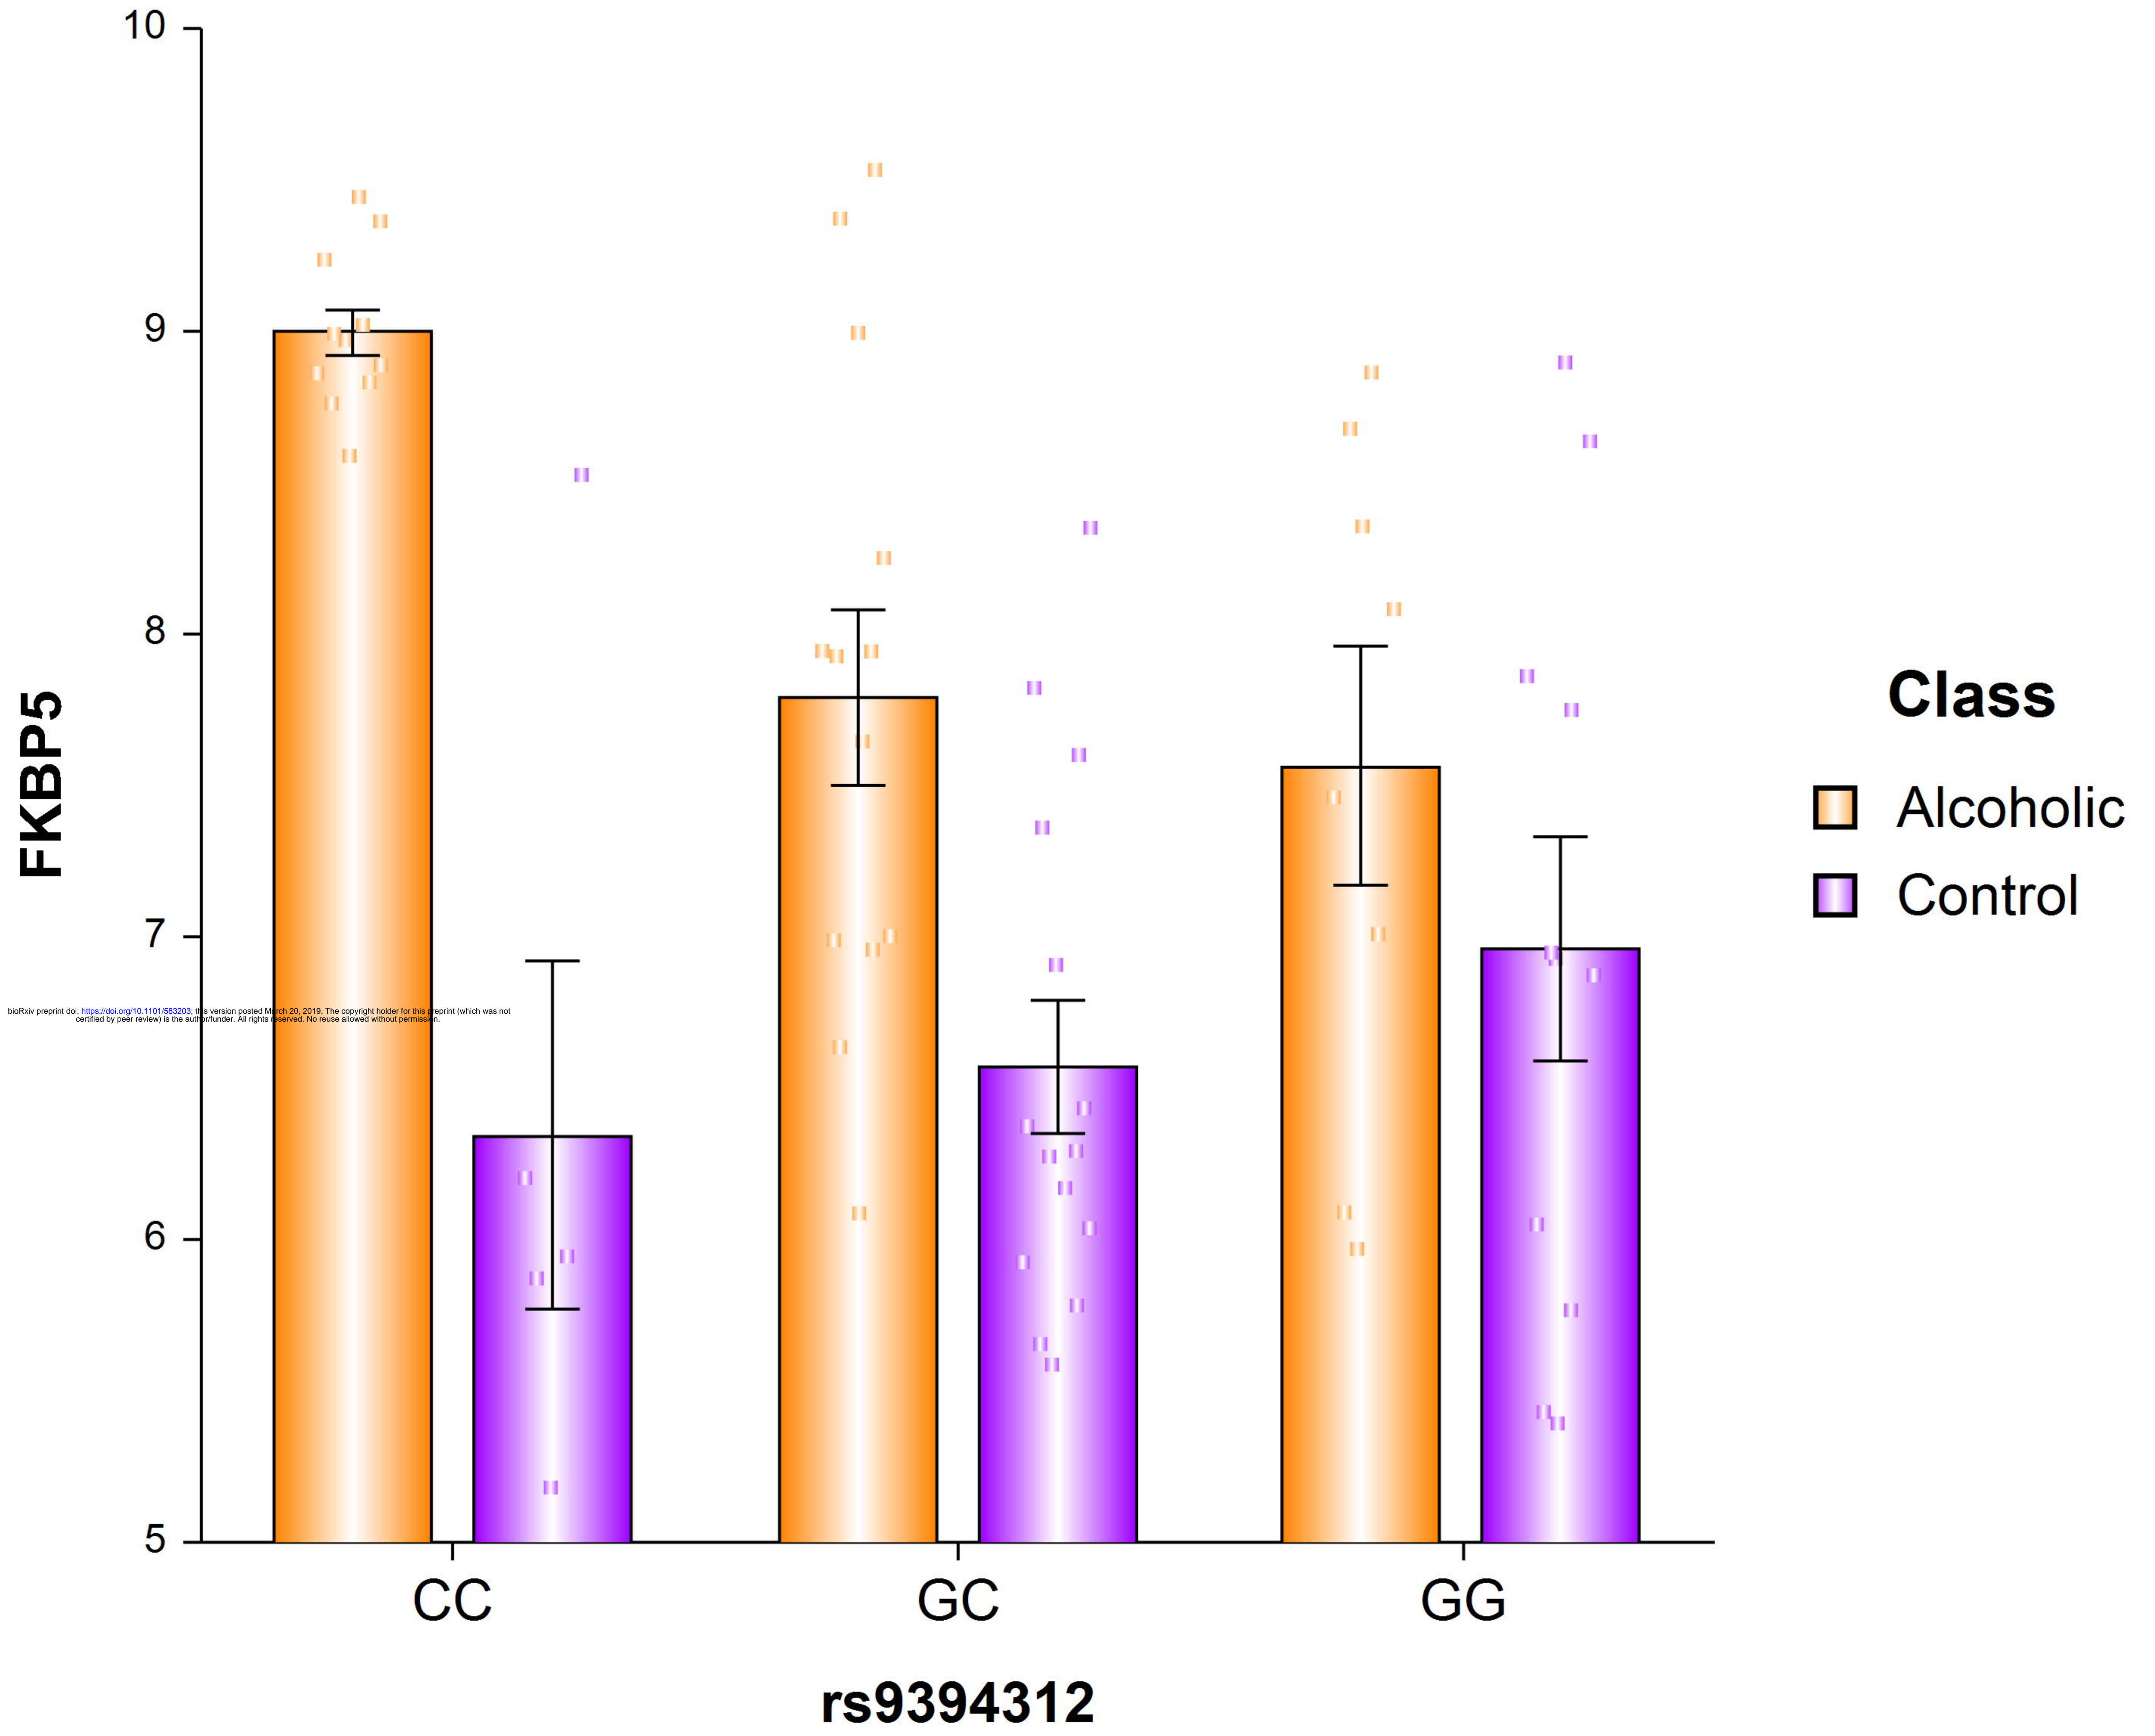

| Name                                                                    | Module Color | SIZE | ES         | NES       | NOM p-val   | FDR q-val    |
|-------------------------------------------------------------------------|--------------|------|------------|-----------|-------------|--------------|
| REACTOME_GENERIC_TRANSCRIPTION_PATHWAY                                  | Green        | 18   | 0.39174604 | 2.0209973 | 0.00617284  | 0.09609686   |
| NABA_MATRISOME                                                          | Greenyellow  | 52   | 0.29716566 | 2.5383055 | 0           | 0.002136364  |
| REACTOME_GENERIC_TRANSCRIPTION_PATHWAY                                  | Greenyellow  | 18   | 0.44453996 | 2.271343  | 0.003868472 | 0.011002417  |
| REACTOME_CYTOKINE_SIGNALING_IN_IMMUNE_SYSTEM                            | Greenyellow  | 16   | 0.36958155 | 1.8165785 | 0.01814516  | 0.052214585  |
| REACTOME_TRANSMEMBRANE_TRANSPORT_OF_SMALL_MOLECULES                     | Greenyellow  | 24   | 0.30484733 | 1.7894949 | 0.009727626 | 0.055684347  |
| KEGG_FOCAL_ADHESION                                                     | Greenyellow  | 25   | 0.28989616 | 1.7495718 | 0.031809144 | 0.056554362  |
| NABA_MATRISOME_ASSOCIATED                                               | Greenyellow  | 32   | 0.263354   | 1.7666267 | 0.026476579 | 0.057339538  |
| NABA_CORE_MATRISOME                                                     | Greenyellow  | 20   | 0.33983636 | 1.8274673 | 0.011538462 | 0.058284443  |
| KEGG_LEUKOCYTE_TRANSENDOTHELIAL_MIGRATION                               | Greenyellow  | 15   | 0.39268157 | 1.8297838 | 0.017045455 | 0.06925771   |
| REACTOME_FATTY_ACID_TRIACYLGLYCEROL_AND_KETONE_BODY_METABOLISM          | Greenyellow  | 16   | 0.39104077 | 1.8677335 | 0.01417004  | 0.07026      |
| REACTOME_METABOLISM_OF_LIPIDS_AND_LIPOPROTEINS                          | Greenyellow  | 40   | 0.25898334 | 1.8926    | 0.009784736 | 0.084817424  |
| REACTOME_CYTOKINE_SIGNALING_IN_IMMUNE_SYSTEM                            | Tan          | 30   | 0.5582678  | 3.6189888 | 0           | 0            |
| REACTOME_INTERFERON_SIGNALING                                           | Tan          | 23   | 0.6121739  | 3.4482594 | 0           | 0            |
| REACTOME_IMMUNE_SYSTEM                                                  | Tan          | 80   | 0.31643414 | 3.1712813 | 0           | 0            |
| REACTOME_INNATE_IMMUNE_SYSTEM                                           | Tan          | 20   | 0.51097137 | 2.762049  | 0           | 0            |
| REACTOME_GENERIC_TRANSCRIPTION_PATHWAY                                  | Tan          | 16   | 0.49438202 | 2.3938062 | 0           | 0.0017111724 |
| NABA_MATRISOME                                                          | Tan          | 52   | 0.27569824 | 2.2962203 | 0           | 0.002778108  |
| REACTOME_ANTIGEN_PROCESSING_CROSS_PRESENTATION                          | Tan          | 15   | 0.46424875 | 2.1254985 | 0.001964637 | 0.007368235  |
| NABA_MATRISOME_ASSOCIATED                                               | Tan          | 36   | 0.28877163 | 2.0132291 | 0.008130081 | 0.014373438  |
| REACTOME_ADAPTIVE_IMMUNE_SYSTEM                                         | Tan          | 49   | 0.22688648 | 1.8398738 | 0.013861386 | 0.036948614  |
| REACTOME_HIV_INFECTION                                                  | Tan          | 21   | 0.30654764 | 1.7100884 | 0.026871402 | 0.06993838   |
| REACTOME_CYTOKINE_SIGNALING_IN_IMMUNE_SYSTEM                            | Tan          | 16   | 0.40826204 | 1.9591156 | 0.005813954 | 0.076536424  |
| REACTOME_HOST_INTERACTIONS_OF_HIV_FACTORS                               | Tan          | 15   | 0.35319522 | 1.6167567 | 0.032       | 0.10237446   |
| NABA_ECM_REGULATORS                                                     | Tan          | 15   | 0.3412781  | 1.5847824 | 0.04637097  | 0.10880603   |
| REACTOME_TCA_CYCLE_AND_RESPIRATORY_ELECTRON_TRANSPORT                   | Turquoise    | 36   | 0.52024674 | 3.5809069 | 0           | 0            |
| REACTOME_RESPIRATORY_ELECTRON_TRANSPORT                                 | Turquoise    | 27   | 0.5581451  | 3.4332826 | 0           | 0            |
| REACTOME_RESPIRATORY_ELECTRON_TRANSPORT_ATP_SYNTHESIS_BY_CHEMIOSMOTIC_C | Turquoise    | 31   | 0.51506513 | 3.377205  | 0           | 0            |
| KEGG_HUNTINGTONS_DISEASE                                                | Turquoise    | 43   | 0.43448094 | 3.345477  | 0           | 0            |
| KEGG_ALZHEIMERS_DISEASE                                                 | Turquoise    | 38   | 0.4251922  | 3.100907  | 0           | 0            |
| KEGG_OXIDATIVE_PHOSPHORYLATION                                          | Turquoise    | 36   | 0.40677297 | 2.9108124 | 0           | 0            |
| KEGG_PARKINSONS_DISEASE                                                 | Turquoise    | 36   | 0.40677297 | 2.8989124 | 0           | 0            |
| KEGG_CARDIAC_MUSCLE_CONTRACTION                                         | Turquoise    | 15   | 0.5186309  | 2.4297206 | 0           | 0.001646979  |
| REACTOME_NGF_SIGNALLING_VIA_TRKA_FROM_THE_PLASMA_MEMBRANE               | Turquoise    | 15   | 0.47475696 | 2.2123554 | 0.002136752 | 0.006105823  |
| REACTOME_NEURONAL_SYSTEM                                                | Turquoise    | 27   | 0.30835184 | 1.9067711 | 0.014522822 | 0.045417827  |
| REACTOME_METABOLISM_OF_MRNA                                             | Turquoise    | 17   | 0.365826   | 1.831359  | 0.007968128 | 0.062365737  |
| REACTOME_SIGNALLING_BY_NGF                                              | Turquoise    | 22   | 0.31402782 | 1.790927  | 0.02008032  | 0.07278288   |
| REACTOME_PLATELET_ACTIVATION_SIGNALING_AND_AGGREGATION                  | Turquoise    | 17   | 0.35091397 | 1.7582463 | 0.013916501 | 0.081596814  |
| REACTOME_TRANSMISSION_ACROSS_CHEMICAL_SYNAPSES                          | Turquoise    | 19   | 0.3222223  | 1.6900269 | 0.026262626 | 0.10649991   |

Table 2. Statistics associated with SNP x Disease status interaction on gene expression

| Gene Symbol             | transcript_type | $b_{(i)}$                    | t-value                     | p-value                    | q-value                   |
|-------------------------|-----------------|------------------------------|-----------------------------|----------------------------|---------------------------|
| CP                      | protein_coding  | -4339.099284                 | -4.17296636                 | 1.06E-04                   | 0.0021200                 |
| FKBP5                   | protein_coding  | -194.1447756                 | -3.892794888                | 2.66E-04                   | 0.0026600                 |
| CFB                     | protein_coding  | -816.8607338                 | -3.575516617                | 7.29E-04                   | 0.0048600                 |
| CP                      | protein_coding  | -2674.651616                 | -3.216831651                | 0.002155381                | 0.0090439                 |
| VWF                     | protein_coding  | -10483.74203                 | -3.200519733                | 0.002260962                | 0.0090439                 |
| CP                      | protein_coding  | -2902.166648                 | -2.992404662                | 0.004111624                | 0.0118070                 |
| SERPINB1                | protein_coding  | -469.2666009                 | -2.978236654                | 0.004278888                | 0.0118070                 |
| MS4A6A                  | protein_coding  | -892.6519535                 | -2.941793914                | 0.004738668                | 0.0118070                 |
| FKBP5                   | protein_coding  | -160.8875175                 | -2.900623299                | 0.00531313                 | 0.0118070                 |
| PEF1                    | protein_coding  | 1051.251682                  | 2.835312324                 | 0.006358287                | 0.0123182                 |
| FKBP5                   | protein_coding  | -161.1241294                 | -2.808411694                | 0.006841617                | 0.0123182                 |
| CFB                     | protein_coding  | -852.5263206                 | -2.779889041                | 0.007390944                | 0.0123182                 |
| ETFB                    | protein_coding  | 3725.712034                  | 2.710880859                 | 0.008892136                | 0.0136802                 |
| CD14                    | protein_coding  | 4597.22194                   | 2.662656152                 | 0.010102021                | 0.0144315                 |
| CFB                     | protein_coding  | -455.8770002                 | -2.60100512                 | 0.011867568                | 0.0150922                 |
| CP                      | protein_coding  | -2998.120486                 | -2.59435938                 | 0.012073783                | 0.0150922                 |
| CP                      | protein_coding  | -2937.772237                 | -2.556507693                | 0.01331174                 | 0.0156609                 |
| KIF19                   | protein_coding  | -176.2846059                 | -2.478319252                | 0.016240449                | 0.0176072                 |
| FKBP5                   | protein_coding  | -135.5325182                 | -2.464543997                | 0.016812949                | 0.0176072                 |
| <a href="#">G054549</a> | long noncoding  | <a href="#">-76.58008707</a> | <a href="#">-2.44596443</a> | <a href="#">0.01761392</a> | <a href="#">0.0176072</a> |
| CFI                     | protein_coding  | -479.7336288                 | -2.422108455                | 0.018692651                | 0.0176072                 |
| SLC2A5                  | protein_coding  | -670.9679148                 | -2.407797313                | 0.019367912                | 0.0176072                 |
| LIPA                    | protein_coding  | 2571.97528                   | 2.377762233                 | 0.02085671                 | 0.0181363                 |
| CFB                     | protein_coding  | -487.8252969                 | -2.343161594                | 0.022698128                | 0.0189151                 |
| IRF1                    | protein_coding  | -893.4275376                 | -2.183954119                | 0.033170244                | 0.0259525                 |
| C1QB                    | protein_coding  | -794.4082368                 | -2.16374536                 | 0.034765474                | 0.0259525                 |
| FKBP5                   | protein_coding  | -143.4456841                 | -2.160400441                | 0.035035906                | 0.0259525                 |
| CLIC1                   | protein_coding  | -8449.40885                  | -1.9737918                  | 0.038346681                | 0.0381048                 |
| SMARCD3                 | protein_coding  | -4225.619536                 | -1.917513507                | 0.040278624                | 0.0415715                 |
| CLIC1                   | protein_coding  | -6404.73533                  | -1.874201051                | 0.046122845                | 0.0440819                 |
| CD14                    | protein_coding  | -3360.788427                 | -1.857196165                | 0.048544994                | 0.0442226                 |
